1    **Development of a machine learning model to estimate biotic ligand model-based**  
2    **predicted no-effect concentrations for copper in freshwater**

3

4

5

6

**Jiwoong Chung<sup>1,2</sup>, Geonwoo Yoo<sup>1</sup>, Jinhee Choi<sup>2</sup>, Jong-Hyeon Lee<sup>1\*</sup>**

7

8

9    <sup>1</sup> Environmental Health & Safety Research Institute, EH Research & Consulting Co. Ltd., E

10    TechHive, 410, Jeongseojin-ro, Seo-gu, Incheon, Republic of Korea

11    <sup>2</sup> School of Environmental Engineering, Graduate School of Energy and Environmental System

12    Engineering, University of Seoul, 90 Jeonnong-dong, Dongdaemun-gu, Seoul, Republic of Korea

13

14    \*Present address:

15    Environmental Health & Safety Research Institute, EH Research & Consulting Co. Ltd., E

16    TechHive, 410, Jeongseojin-ro, Seo-gu, Incheon, Republic of Korea

17

18    \*Corresponding author: Tel.: +82 32 0000 0000; Fax: +82 32 0000 0000

19    E-mail address: [jhleecheju@gmail.com](mailto:jhleecheju@gmail.com)

20

21

22

## 23 **Abstract**

24 The copper biotic ligand model (BLM) has been used for environmental risk assessment by taking  
25 into account the bioavailability of copper in freshwater. However, the BLM-based environmental  
26 risk of copper has been assessed only in Europe and North America, with monitoring datasets  
27 containing all of the BLM input variables. For other areas, it is necessary to apply surrogate tools  
28 with reduced data requirements to estimate the BLM-based predicted no-effect concentration  
29 (PNEC) from commonly available monitoring datasets. To develop an optimized PNEC estimation  
30 model based on an available monitoring dataset, an initial model that considers all BLM variables,  
31 a second model that requires variables excluding alkalinity, and a third model using electrical  
32 conductivity as a surrogate of the major cations and alkalinity have been proposed. Furthermore,  
33 deep neural network (DNN) models have been used to predict the nonlinear relationships between  
34 the PNEC (outcome variable) and the required input variables (explanatory variables). The  
35 predictive capacity of DNN models in this study was compared with the results of other existing  
36 PNEC estimation tools using a look-up table and multiple linear and multivariate polynomial  
37 regression methods. Three DNN models, using different input variables, provided better  
38 predictions of the copper PNECs compared with the existing tools for four test datasets, i.e.,  
39 Korean, United States, Swedish, and Belgian freshwaters. The adjusted  $r^2$  values in all DNN  
40 models were higher than 0.95 in the test datasets, except for the Swedish dataset (adjusted  $r^2 >$   
41 0.87). Consequently, the most applicable model among the three DNN models could be selected  
42 according to the data availability in the collected monitoring database. Because the most simplified  
43 DNN model required only three water quality variables (pH, dissolved organic carbon, and  
44 electrical conductivity) as input variables, it is expected that the copper BLM-based risk  
45 assessment can be applied to monitoring datasets worldwide.

46

47 **Keywords:** copper, bioavailability, biotic ligand model (BLM), predicted no-effect concentrations

48 (PNEC), deep neural network (DNN)

49

50

51

52

53

54

55

56

57

58

59

60

61

62

63

64

65

66

67

68

## 69 **1. Introduction**

70 The copper biotic ligand model (BLM) is used to assess environmental risks and toxicity for copper  
71 based on its bioavailability because the toxicity of copper in aquatic systems is highly dependent  
72 on site-specific water chemistry. The model assumes that the binding of free copper ions to biotic  
73 ligands, together with the competitive effects of major cations, determines copper toxicity [1, 2].  
74 There are a number of essential input variables (pH, dissolved organic carbon (DOC), major  
75 cations, and alkalinity) required to derive the predicted no-effect concentration (PNEC) and an  
76 effective environmental quality standard based on the copper BLM. However, monitoring  
77 databases containing all BLM input variables are available only for a few regions, such as the  
78 United States and Europe. Regulatory monitoring databases, which are not intended for use in  
79 BLM-based risk assessments, contain only general water quality variables and hazardous  
80 substances as monitoring variables.

81 Although existing PNEC estimation tools can produce uncertain results due to the use of only a  
82 few assessment parameters, a BLM-based risk assessment can be conducted in regions where not  
83 all of the data required as BLM input variables are available. The Bio-met look-up table, the  
84 Environment Agency metal-bioavailability assessment tool (mBAT), which uses a multivariate  
85 polynomial function, and PNEC-pro, which uses multiple linear regression (MLR), require pH,  
86 DOC, and Ca, as the most influential variables to determine BLM-based PNECs [3-5]. However,  
87 the use of Ca as a representative variable of the major cations and alkalinity in existing tools has  
88 not significantly broadened the ecoregion for which BLM-based risk assessments can be applied.  
89 The Ca content may or may not be included as a common regulatory monitoring variable in  
90 different ecoregions. There is a need for new input variables that can act as a surrogate for the  
91 major cations and alkalinity within water quality variables while maintaining a good predictive

92 capacity for the BLM-based PNECs. In this study, electrical conductivity was considered a  
93 surrogate variable and is one of the recommended variables used to estimate the values of a missing  
94 BLM variable [6, 7].

95 New PNEC estimation models should be developed using a method that minimizes the remaining  
96 uncertainty by using the input variables from available monitoring datasets. In this study, a deep  
97 neural network (DNN) was used rather than the statistical methods that are applied in existing tools.  
98 The DNN was expected to provide an optimized predictive capacity for the nonlinear relationship  
99 between the BLM-based PNEC and the BLM input variables. The DNN is an approximator of  
100 universal function. It is an artificial neural network consisting of multiple hidden layers between  
101 the input and output layers, and therefore complex nonlinear relationships can be modeled by  
102 stacking more hidden layers [8].

103 Another factor determining the predictive capacity of the PNEC estimation model is that the  
104 dataset used to develop it must be sufficiently representative of freshwater chemistry. In the dataset  
105 used for the development of Bio-met and mBAT, Peters et al. (2011) assumed that most of the Mg,  
106 Na, and alkalinity could be determined from Ca concentrations [9]. This means that a dataset  
107 consisting of a combination of only three variables (pH, DOC, and Ca) would not cover the full  
108 range of BLM input variables. The dataset used for the development of PNEC-pro is from a  
109 monitoring database from the Netherlands. Further validation is therefore necessary to apply  
110 PNEC-pro to ecoregions with different water chemical properties. As a result, simulation data with  
111 full coverage of the domain of BLM input variables is needed for the development of the PNEC  
112 estimation model.

113 The aim of this study was to develop an optimized PNEC estimation model depending on the  
114 available monitoring dataset. For this purpose, a realistic training dataset with sufficiently

115 representative freshwater chemistry was built to combine all the BLM input variables, and three  
 116 different models with a different number of input variables were proposed by the DNN. The most  
 117 simplified model required only general water quality parameters, such as pH, DOC, and electrical  
 118 conductivity, and could be used for copper BLM-based risk assessments using various monitoring  
 119 datasets that are available worldwide.

120

## 121 2. Materials and methods

### 122 2.1. Calculation of the BLM-based PNECs for copper

123 A general formula for a copper BLM (the *Daphnia magna* BLM) is shown in Eq 1 [10]. According  
 124 to the European Union Risk Assessment Report (EU-RAR) [11], the acute *D. magna* BLM was  
 125 used as the chronic fish BLM as follows:

$$\begin{aligned}
 & EC50_{Cu^{2+}} \\
 &= \frac{f_{CuBL}^{50\%}}{(1 - f_{CuBL}^{50\%}) \cdot K_{CuBL}} \cdot \frac{\{1 + K_{CaBL} \cdot (Ca^{2+}) + K_{MgBL} \cdot (Mg^{2+}) + k_{NaBL} \cdot (Na^+) + K_{HBL} \cdot (H^+)\}}{\{1 + R_{CuOHBL} \cdot K_{CuOH} \cdot (OH^-) + R_{CuCO3BL} \cdot K_{CuCO3} \cdot (CO_3^{2-})\}} \quad (1)
 \end{aligned}$$

127 where  $f_{CuBL}^{50\%}$  is the fraction of the total number of copper-binding sites occupied by copper at the  
 128 50% toxic effect, and  $K$  represents biotic ligand constants, such as  $K_{CaBL}$ ,  $K_{MgBL}$ ,  $K_{NaBL}$ ,  $K_{HBL}$ ,  
 129  $R_{CuOHBL}$  ( $K_{CuOHBL} / K_{CuBL}$ ), and  $R_{CuCO3BL}$  ( $K_{CuCO3BL} / K_{CuBL}$ ). The formula for the chronic *D.*  
 130 *magna* BLM is shown in Eq 2 [12].

$$\begin{aligned}
 & 21d - EC50_{Cu^{2+}} = \frac{f_{CuBL}^{50\%}}{(1 - f_{CuBL}^{50\%}) \cdot K_{CuBL}} \cdot \frac{1 + 471 \{1 + K_{HBL} \cdot 10^{-6.8}\} \cdot (Na^+) + K_{HBL} \cdot (H^+)}{\{1 + R_{CuOHBL} \cdot K_{CuOH} \cdot (OH^-) + R_{CuCO3BL} \cdot K_{CuCO3} \cdot (CO_3^{2-})\}} \\
 & (2)
 \end{aligned}$$

133 To calculate the BLM-based PNEC in the training and test datasets, site-specific chronic toxicity  
 134 values were calculated from toxicity data for 27 aquatic organisms provided by the EU-RAR [11]

135 . The biotic ligand and inorganic stability constants for each BLM were applied to three taxonomic  
136 groups, algae, invertebrates, and vertebrates, and are shown in [SI Table](#). The BLM-based PNECs  
137 were derived by applying an assessment factor of one to the fifth percentile value (HC5) in the  
138 species sensitivity distribution.

139

## 140 ***2.2. Training and test datasets***

141 The training data for DNN model development were built by simulating BLM-based PNECs based  
142 on the combination of BLM input variables, including various water chemistry parameters. A  
143 monitoring database of Korean freshwater parameters was used to establish the domain range of  
144 the training dataset, in which real correlations between BLM input variables were taken into  
145 account. The combination of BLM variables was generated from the linear regressions between  
146 each variable, and the extent of the domain range was determined by a factor of five of the linear  
147 regression results.

148 Monitoring databases for four ecoregions were used as test datasets. The Korean dataset contained  
149 764 individual samples from the Han River, Guem River, Yeongsan River, and Seomjin River  
150 collected from a search of the Environmental Digital Library of the Ministry of Environment from  
151 2014 to 2016 (<https://library.me.go.kr>). The Swedish dataset contained 4,639 individual samples  
152 (999 river samples, 1,914 Malar Lake samples, and 1,726 tributary samples) collected from the  
153 Swedish river monitoring program of the Swedish University of Agricultural Sciences from 1997  
154 to 2020 (<https://www.slu.se/vatten-miljo>). The United States dataset included 279 samples  
155 collected in the water monitoring datasets of the Oregon Department of Environmental Quality  
156 Water Monitoring Data Portal ([https://www.oregon.gov/deq/Data-and-  
157 Reports/Pages/default.aspx](https://www.oregon.gov/deq/Data-and-Reports/Pages/default.aspx)) and included 84 samples collected from the draft technical support

158 document of the United States Environmental Protection Agency (US EPA, 2016). The Belgian  
159 dataset contained 3,187 individual samples reported by Nys et al. (2018) [13].

160

### 161 **2.3. The DNN models**

162 To estimate the BLM-based PNECs in the available monitoring dataset, an initial model that  
163 considered all BLM variables, a second model that required variables excluding alkalinity, and a  
164 third model using pH, DOC, and electrical conductivity were developed by a DNN. Optimization  
165 of the architecture of the DNN models, which is an artificial neural network composed of several  
166 hidden layers between an input layer and an output layer, was performed empirically. The numbers  
167 of layers and nodes, which are the main hyperparameters that determine the DNN architecture,  
168 were established to minimize the training and validation losses during a fixed period within the  
169 search range of hyperparameters, as shown in Table 1. A DNN is generally considered to have at  
170 least two hidden layers, and generalization is better with a feedforward neural network with two  
171 hidden layers than with one layer according to Thomas et al. (2017) [8]. In this study, the training  
172 and validation losses converged to low values when the input layer had three, five, or six nodes,  
173 the three hidden layers had 20, 15, or 10 nodes, and the output layer had one node. In addition,  
174 these losses decreased stably at a learning rate of 0.005. If the learning rate was 0.1, the losses did  
175 not decrease, and if it was less than 0.0001, the losses decreased slowly. The loss values for training  
176 were calculated as follows:

$$177 \quad \sum_{l=1}^n \{ \log_{10}(\text{the BLM\_based PNEC}) - \log_{10}(\text{the predicted PNEC by DNN}) \}^2 \quad (3)$$

178 Losses are reduced more by the AdaMax algorithm, which is a variant of the AdaM algorithm  
179 based on the infinity norm, than by the AdaM algorithm and the stochastic gradient descent method



180 [14]. The AdaMax algorithm extends the part of the algorithm that adjusts the learning rate based  
181 on the  $L^2$  norm in the AdaM algorithm to the  $L^p$  norm.

182 Two different types of activation functions were considered for the DNNs. The sigmoid activation  
183 function has traditionally been used as a bounded and monotonically increasing differentiable  
184 function. As a remedy for vanishing gradients, the rectified linear unit (ReLU) function [15] has  
185 computational advantages over the sigmoid activation function, according to Schmidt-Hieber  
186 (2020) [16]. The training and validation losses were reduced more reliably when using the sigmoid  
187 function for the first and second hidden layers, and ReLU for the last hidden layer, than when  
188 using ReLU for all layers. The epoch, which is the number of iterations of the process of updating  
189 the neural network parameters to the loss decreases, was 20,000. For training the dataset, 70% of  
190 the randomly shuffled data were used for training and the remaining 30% for validation. The DNN  
191 models were implemented using Pytorch version 1.8.1 in Python v3.7 software.

192

#### 193 ***2.4. Data Treatment and Statistics***

194 The HC5 for the derivation of PNEC for copper was calculated assuming a log-normal distribution  
195 of species sensitivity in the ETX 2.0 software [17]. Normality tests, such as the Anderson–Darling,  
196 Kolmogorov–Smirnov, and Cramer von Mises tests, were performed using ETX 2.0 software. A  
197 speciation model, such as the Windermere Humic Aqueous Model 7 (WHAM), is required to  
198 estimate the site-specific free ion activities for copper and the major cations in training and test  
199 datasets [18]. Some element-specific parameters were changed from WHAM-provided values to  
200 copper BLM-provided constants (S1 Table). Humic acid and fulvic acid, as input variables of the  
201 WHAM, were assumed to be 0.001% and 50% of the DOC concentration, respectively, according  
202 to the EU-RAR [11]. The predictive capacity of PNEC estimation tools, including the newly

203 developed DNN models, was compared using the Akaike information criterion (AIC), residual  
204 standard error (RSE), and adjusted  $r^2$  value. All statistics were calculated using Python v3.5  
205 software.

206 MLR was performed to determine the appropriate electrical conductivity in the training dataset  
207 from the combination of BLM variables, i.e., Ca, Mg, Na, pH, and DOC. The most relevant BLM  
208 variables were selected for inclusion in the MLR function for electrical conductivity. The general  
209 formula for MLR was as follows:

$$\text{Electrical Conductivity} = a + (b \cdot \text{variable}_1) + (c \cdot \text{variable}_2) + \dots + (f \cdot \text{variable}_5)$$

210  
211 (4)

212 The calculation was completed using a function in R ([The R Project for Statistical Computing](#)).  
213 Whether the predictive capacity of the MLR model was dependent on the type of BLM variable  
214 considered was determined by the AIC [19].

215

### 216 **3. Results**

#### 217 ***3.1. The development of DNN model for the estimation of the BLM-based PNECs***

218 The DNN models were developed using the training data for the simulated BLM-based PNECs  
219 with various combinations of BLM input variables, in which the domain ranges of input variables  
220 reflected water chemistry monitoring data from the northern hemisphere. The real correlations  
221 among the BLM variables shown in [S1 Fig](#) were taken into account to establish the domain range  
222 of the training dataset. The extent of these domain ranges was determined by a factor of five of the  
223 linear regression results between each variable. The Mg, Na, and K concentrations and alkalinity  
224 were generated from the correlations with Ca ([Fig 1A](#)). From the combination of these generated

225 variables, only combinations within the domain range were selected to calculate the BLM-based  
226 PNEC for copper (Fig 1B). The pH and DOC ranges were 5.5–9.9 and 0.1–50 mg L<sup>-1</sup>, respectively.  
227 The electrical conductivity estimation model for generating electrical conductivity values from the  
228 training dataset was developed by MLR with simplified BLM input variables, using three  
229 monitoring datasets ( $n = 5,682$ ) for Korean, Swedish, and the United States freshwaters. Each of  
230 the three models required a different number of BLM variables. The first model considered five  
231 BLM variables (Ca, Mg, Na, alkalinity, and pH), the second model excluded pH, and the third  
232 model excluded pH and alkalinity. The S2 Table shows good agreement between the measured  
233 electrical conductivity and the electrical conductivity calculated by the three models (adjusted  $r^2$   
234 = 0.959–0.959). As a result, electrical conductivity values in the training dataset were generated  
235 using a simplified three-variable (Ca, Mg, and Na) model (Fig 1C).

236 To develop an optimized PNEC estimation model based on an available monitoring dataset, the  
237 DNN(a) model that considered all BLM variables, the DNN(b) model that required all variables  
238 excluding alkalinity, and the DNN(c) model that used electrical conductivity as a surrogate of the  
239 major cations and alkalinity, were proposed. All of the different DNN models showed a sharp  
240 decrease in validation loss after approximately 1,000 epochs without overfitting and flattened out  
241 after 10,000 epochs (Fig 2). When the PNECs predicted by the DNN(a), DNN(b), and DNN(c)  
242 models within the training dataset were compared with the BLM-based PNECs, the adjusted  $r^2$   
243 values were 0.994, 0.990, and 0.965, respectively. As a result, all of the DNN models used in this  
244 study were considered sufficiently trained until two constant losses occurred.

245

246 ***3.2. Comparison of PNEC estimation tools with newly developed DNN models***

247 The four test datasets, Korean, United States, Belgian, and Swedish freshwaters, were used to  
248 evaluate the predictive capacity of the DNN models and the existing PNEC estimation tools. The  
249 differences in water chemistry properties among these four test datasets are shown in [S2 Fig](#) as a  
250 histogram of the frequency versus concentration of each variable. Korean freshwater had the  
251 lowest Ca and DOC concentrations (95<sup>th</sup> percentile: 16 mg Ca L<sup>-1</sup> and 8.5 mg DOC L<sup>-1</sup>) and the  
252 highest pH (95<sup>th</sup> percentile: 8.9). Swedish freshwater had the lowest sodium concentration (95<sup>th</sup>  
253 percentile: 26 mg Na L<sup>-1</sup>), and Belgian freshwater had the lowest alkalinity (95<sup>th</sup> percentile: 13 mg  
254 CaCO<sub>3</sub> L<sup>-1</sup>). United States freshwater had the highest alkalinity (95<sup>th</sup> percentile: 169 mg CaCO<sub>3</sub>  
255 L<sup>-1</sup>). The application coverage of the DNN model for various water chemistry conditions was  
256 dependent on the range of variables in the simulated training dataset. This dataset was considered  
257 to be more broadly representative of the water chemistry range compared with the test datasets,  
258 and these results affected the predictive capacity of the DNN models ([Fig 3](#)).

259 Evaluation of the predictive capacity of the three DNN models in this study and comparison of the  
260 results with those obtained by existing tools were performed for four ecoregions (test datasets),  
261 and the results are shown in [Table 2](#). For Korean freshwater, comparison of the predictive capacity  
262 among the PNEC estimation models is shown in [Fig 4](#). The DNN(a) model provided good  
263 predictions (adjusted  $r^2 = 0.987$ ,  $p < 0.01$ ). The DNN(b) and DNN(c) models provided predictions  
264 similar to those of DNN(a) (adjusted  $r^2 = 0.968$  and  $0.978$ , respectively,  $p < 0.01$ ). Among the  
265 existing models, PNEC-pro provided less reliable predictions (adjusted  $r^2 = 0.537$ ,  $p < 0.05$ ),  
266 whereas Bio-met and mBAT provided good predictions (adjusted  $r^2 = 0.904$  and  $0.937$ ,  $p < 0.01$ ).

267 For Swedish freshwater, a comparison of the predictive capacity between the PNEC estimation  
268 models is shown in [Fig 5](#). The DNN(a) model also provided good predictions (adjusted  $r^2 = 0.974$ ,  
269  $p < 0.01$ ). The coefficients of determination of the DNN(b) and DNN(c) models were similar

270 (adjusted  $r^2 = 0.872$  and  $0.885$ , respectively,  $p < 0.01$ ), and were lower than those of DNN(a). For  
271 the existing models, the coefficients of determination were lower than  $0.7$  (adjusted  $r^2 = 0.670$  for  
272 Bio-met,  $0.529$  for PNEC-pro, and  $0.516$  for mBAT,  $p < 0.05$ ).

273 For United States freshwater, a comparison of the predictive capacity among the PNEC estimation  
274 models is shown in [Fig 6](#). The three DNN models provided good predictions (adjusted  $r^2 = 0.989$   
275 for DNN(a),  $0.974$  for DNN(b), and  $0.975$  for DNN(c),  $p < 0.01$ ). Among the existing tools, Bio-  
276 met and mBAT provided good predictions (adjusted  $r^2 = 0.929$  and  $0.926$ , respectively,  $p < 0.01$ ),  
277 whereas PNEC-pro provided less reliable predictions (adjusted  $r^2 = 0.421$ ,  $p < 0.05$ ).

278 For Belgian freshwater, a comparison of the predictive capacity among the PNEC estimation  
279 models is shown in [Fig 7](#). The coefficients of determination of the three DNN models and Bio-met  
280 were  $> 0.9$  (adjusted  $r^2 = 0.972$  for DNN(a),  $0.95$  for DNN(b),  $0.954$  for DNN(c), and  $0.93$  for Bio-  
281 met,  $p < 0.01$ ). The mBAT also provided good predictions (adjusted  $r^2 = 0.873$ ,  $p < 0.01$ ), whereas  
282 PNEC-pro provided less reliable predictions (adjusted  $r^2 = 0.273$ ,  $p < 0.05$ ).

283 Consequently, all PNEC estimation models based on the DNN method provided good predictions  
284 in the four ecoregions ([Table 2](#)). The DNN(a) model using all BLM input variables had the lowest  
285 AIC and RSE values and the highest adjusted  $r^2$ . The DNN(c) model using the variables of  
286 electrical conductivity, pH, and DOC had the second lowest AIC and RSE values and the second  
287 highest adjusted  $r^2$ . The DNN(b) model using five BLM variables (excluding alkalinity) also  
288 provided good predictions, which were very similar to those of DNN(c).

289 Among the existing PNEC estimation tools, the lowest AIC and highest adjusted  $r^2$  values were  
290 obtained for Bio-met, based on the look-up table method, while the second lowest AIC and second  
291 highest adjusted  $r^2$  were obtained for mBAT, based on a multivariate polynomial function with

292 interaction terms. Compared with the other models, PNEC-pro, based on MLR, had a less reliable  
293 predictive capacity for the test datasets.

294

## 295 **4. Discussion**

### 296 *4.1. The development of DNN model for the estimation of the BLM-based PNECs*

297 To develop an optimized PNEC estimation model based on available monitoring datasets, the  
298 DNN(a) model that considered all BLM variables, the DNN(b) model that required all variables  
299 excluding alkalinity, and the DNN(c) model that used electrical conductivity as a surrogate of the  
300 major cations and alkalinity were proposed. These three types of BLM-based PNEC estimation  
301 models, using training dataset with various water chemistries, were developed by a DNN to  
302 optimize the prediction of nonlinear relationships between input variables (explanatory variables)  
303 and BLM-based PNECs (dependent variables). The learning result of the DNN(a) model was  
304 predicted to be within a factor of two of that of the BLM-based PNEC for 100% of the data in the  
305 training dataset ( $n = 107,712$ ) (Fig 2). This was an expected result because the DNN used for  
306 model development was a universal approximation function and was the result of the excellent  
307 learning of nonlinear relationships based on large amounts of simulated data. Because simulation  
308 data with full coverage of the domain of input variables were used as the training dataset, there  
309 was no need to use additional validation and test datasets. The learning results of the DNN(b) and  
310 DNN(c) models were predicted to be within a factor of two of the BLM-based PNECs for 98.5%  
311 and 88.3% of the data, respectively.

312 Among the existing PNEC estimation tools, mBAT was developed using a multivariate polynomial  
313 function to predict the nonlinear relationships between input variables (pH, DOC, and Ca) and the  
314 BLM-based PNECs for copper [4]. Although two functions were proposed for Ca ( $>$  and  $<$  6 mg

315  $L^{-1}$ ) to counteract low Ca concentrations, the validation results of the prediction accuracy for  
316 PNECs within the dataset used for development have not been described. PNEC-pro was  
317 developed by a simple MLR using monitoring data ( $n = 241$ ) from the Netherlands and provides  
318 validation results for the prediction accuracy (adjusted  $r^2 = 0.882$ ) [5]. After determining the MLR  
319 function from the learning data of this study, the validation results are shown in S3 Fig. The  
320 adjusted  $r^2$  value was 0.838, which was lower than that of the DNN models (adjusted  $r^2 = 0.965$   
321 for DNN(c) using three variables, Fig 2C). As a result, the DNN models including the most  
322 simplified model can be considered the most appropriate method to optimize the prediction of the  
323 nonlinear relationship between the required input variables and the BLM-based PNECs in a large  
324 training dataset reflecting water chemistry monitoring data from the northern hemisphere.

325

#### 326 ***4.2. Comparison of existing PNEC estimation tools with newly developed DNN models***

327 A copper BLM-based PNEC has been proposed in Europe and the United States for environmental  
328 risk assessment, taking into account the site-specific bioavailability of copper [11, 19]. To derive  
329 the BLM-based PNEC, monitoring datasets including all BLM input variables (pH, DOC, major  
330 cations, and alkalinity) are essential for estimating water chemistry speciation, such as the activity  
331 of free copper ions, copper speciation, and major cations. However, these datasets are available  
332 only in a few regions, such as the United States and Europe. Because some BLM variables may be  
333 missing from available datasets, several methods have been proposed to estimate the values of the  
334 missing variables [6, 9].

335 To simulate the derivation of BLM-based PNECs that require all of these input variables,  
336 simplified and user-friendly PNEC estimation tools using a reduced number of variables (e.g., Bio-  
337 met, mBAT, and PNEC-pro) have been proposed [3-5]. Among these tools, the minimum data

338 requirements for Bio-met and mBAT are pH, DOC, and Ca. pH affects copper toxicity in aquatic  
339 organisms and is routinely measured in field samples using a variety of water quality measurement  
340 instruments. DOC in freshwater can bind copper and reduce the interaction between free copper  
341 ions and aquatic organisms. Non-linear relationships among pH, copper toxicity, and the binding  
342 properties of DOC have been reported in EU-RARs [11]. Although the Ca concentration or  
343 hardness is a less influential variable than pH and DOC, it is a more statistically effective variable  
344 for PNEC than other cations and alkalinity [5]. In addition, it has been reported that an increase in  
345 the Ca concentration does not result in an increase in PNEC [9]. However, it may or may not be  
346 included as a general water quality variable in regulatory monitoring databases. Therefore, Bio-  
347 met and mBAT, which only require the concentration of Ca among the major cations, do not  
348 significantly broaden the ecoregion where a BLM-based risk assessment can be applied. Because  
349 Ca, Mg, and Na are monitoring variables that can be measured by the same analyzer in one sample,  
350 it may be more efficient to improve the predictive capacity by using the concentrations of all  
351 available major cations. In PNEC-pro, if Ca is not considered an input variable, the accuracy  
352 (adjusted  $r^2$ ) is less than 0.8 [5].

353 As a result, to apply a BLM-based risk assessment over a wider ecoregion, the major cations should  
354 be excluded from the minimum data requirements, and surrogate variables contributing to the good  
355 predictions for the BLM-based PNEC are required. In this study, electrical conductivity was  
356 considered a surrogate of the major cations and alkalinity. Electrical conductivity is typically  
357 included as a water quality variable in general regulatory water quality-monitoring databases.  
358 Electrical conductivity is one of the variables recommended for estimating the concentrations of  
359 missing BLM variables via its linear relationships with BLM variables [6, 7].



360 In the test datasets (four ecoregions), PNEC predictions were less reliable by the existing PNEC  
361 estimation tools than by the three different DNN models (Table 2). This was likely because the  
362 training datasets used for the development of each existing tool were not sufficiently representative  
363 of the different water chemistries, and the statistical and look-up table methods used for PNEC  
364 estimation provided limited predictive capacities for the nonlinear relationships between PNEC  
365 and BLM variables. Therefore, in this study, a training dataset representative of various freshwater  
366 chemistries was built for the DNN models. Its subsequent use resulted in a wide range of  
367 applications and good predictive capacity.

368 To design a representative training dataset, the frequencies of each BLM input variable and their  
369 relationships were investigated in the Korean freshwater monitoring database (S1 Fig). The  
370 domain ranges for water chemistry variables were determined from the abovementioned results  
371 (Fig 1). The pH conditions were generated as continuous values rather than multiple level  
372 conditions with intervals because pH was the only variable that had a non-linear relationship with  
373 PNEC. Another 9,792 combinations of Ca, Mg, Na, K, alkalinity, and DOC were generated  
374 assuming the same pH. Then 9,792 continuous pH variations were generated within the pH  
375 condition interval. These values were randomly arranged and added to the combined data of other  
376 variables.

377 The datasets used to develop the existing tools did not cover the full domain range of BLM input  
378 variables. For the mBAT training dataset, the Mg and Na concentrations and alkalinity were  
379 determined by Ca according to Peters et al. (2011) [9] and therefore consisted of a combination of  
380 only three variables: pH, DOC, and Ca. For the Bio-met training dataset, the Mg concentration  
381 was considered to be Ca-dependent, the Na concentration was considered to be dependent on four  
382 other factors, and alkalinity was determined to be dependent on pH as well as three other factors.

383 The pH conditions of Bio-met were determined at 21 levels ranging from 6.0 to 8.5, while mBAT  
384 did not describe the pH conditions in detail. PNEC-pro, which was developed using monitoring  
385 data rather than simulation data, requires data from a wider ecoregion than just the Netherlands,  
386 the basis of its development.

387 To generate electrical conductivity data for the training dataset in this study, the use of MLR-based  
388 models to estimate electrical conductivity from BLM input variables has been proposed. To  
389 develop these models, the monitoring datasets from Korea, the United States, and Sweden were  
390 used because they included all BLM input variables and electrical conductivity. The final  
391 estimation model for electrical conductivity using Ca, Mg, and Na in [Table 2](#) had a good predictive  
392 capacity, within a factor of two for 99.2% of the electrical conductivity data measured in the three  
393 ecoregions ( $n = 5,682$ ) ([S4 Fig](#)). As a result, because the range of water chemistry data in the final  
394 training dataset with electrical conductivity covered the ranges of BLM input variables in the four  
395 test datasets (Korean, Swedish, United States, and Belgian freshwaters), it was considered to be  
396 sufficiently representative of the freshwater chemistry ([Fig 3](#)).

397 Better predictions of the copper PNECs were obtained from the three different types of DNN  
398 models trained and validated using the representative simulation training dataset than from the  
399 existing tools in the four test datasets (Korean, United States, Swedish, and Belgian freshwaters).  
400 The adjusted  $r^2$  values were higher than 0.95 in all but the Swedish freshwater dataset. Although  
401 the minimum adjusted  $r^2$  value in Swedish freshwater was 0.87, it was higher than the results  
402 obtained using the existing tools. The use of reduced input variables for the DNN(b) and DNN(c)  
403 models in Swedish freshwater, which had a lower pH and major cation concentration compared  
404 with the other regions, was probably why the adjusted  $r^2$  values (0.87 and 0.89, respectively) were  
405 lower than the value of 0.97 obtained with the DNN(a) model using all BLM variables ([S2 Fig](#)).

406 The mBAT and PNEC-pro predictions were less accurate than those of the DNN models,  
407 indicating that general statistical methods (multivariate polynomial regression and MLR) were not  
408 sufficient for predicting the nonlinear relationships between input variables and PNECs. A look-  
409 up table method, such as Bio-met, was expected to have a higher predictive capacity when used as  
410 the training dataset in this study, while the PNEC calculation performed in Excel required a  
411 considerable amount of time. The water chemistry conditions did not match the conditions in the  
412 training dataset, and its prediction accuracy was expected to be lower than that calculated by the  
413 DNN.

414 An important finding was the similar prediction accuracy in the test datasets of the three DNN  
415 models using different types of input variables to develop optimized PNEC estimation models  
416 depending on the available monitoring datasets. This means that even with reduced input variables,  
417 a good prediction capacity can be expected by a DNN model that includes the key input variables  
418 for a BLM. In particular, the DNN(c) model, which was selected as the most simplified surrogate  
419 tool, was shown to have a predictive capacity similar to that of the DNN(a) model, which provided  
420 the best prediction. Electrical conductivity played an important role as a variable acting as a  
421 surrogate for the major cations and alkalinity. Although there is further scope to reduce the  
422 uncertainty in the predicted PNECs by the DNN(c) model at a low pH and Ca concentration, such  
423 as in the Swedish freshwater, it is necessary to assess the environmental risk for copper using  
424 DNN(a) from all measured input variables. Consequently, according to the variables in the  
425 available monitoring databases, the most applicable model could be selected from among the three  
426 DNN models.

427 It is possible to reduce the uncertainty in the BLM-based PNECs estimated by the final surrogate  
428 tool in a specific region using a monitoring database containing the concentration of total organic

429 carbon (TOC) rather than DOC. Both electrical conductivity and pH can be measured in field  
430 samples using commonly available water quality instruments and are included in most regulatory  
431 monitoring databases. The organic carbon concentration in freshwater is usually measured as TOC  
432 in monitoring databases unless the database is used for the purpose of bioavailability-based risk  
433 assessments. Among the test datasets in this study, the datasets from Korea, the United States, and  
434 Belgium included DOC concentrations for bioavailability-based risk assessments. The DOC  
435 concentration in the Swedish dataset was estimated by applying the 0.8 ratio, which is the simplest  
436 method of estimating DOC from TOC concentrations [11, 20]. However, the DOC concentration  
437 in Korean rivers is 64.3–79% of the TOC concentration, according to Kim et al. (2007) [21]. For  
438 surface waters in Poland and Germany, the DOC concentration range was 80–92% of the TOC  
439 concentration [22]. Thus, the observed DOC may be used to reduce the uncertainty of the BLM-  
440 based PNEC estimated using a surrogate tool.

441

## 442 **5. Conclusion**

443 This study developed three different types of DNN models, each requiring different input  
444 variables, which provide better predictions of the BLM-based PNECs for copper than existing  
445 PNEC tools in various ecoregions. The most applicable model among the three DNN models can  
446 be selected according to the available variables in monitoring databases. Furthermore, it is  
447 expected that the most simplified DNN model, using only general water quality variables (pH,  
448 DOC, and electrical conductivity), will enable the copper BLM-based risk assessment to be applied  
449 to monitoring datasets worldwide.

450

## 451 **Acknowledgments**

452 This work was supported by Korea Environment Industry & Technology Institute (KEITI) through  
453 the Technology Development Project for Safety Management of Household Chemical Products  
454 funded by Korea Ministry of Environment (MOE) (2020002970009, 1485017560)

455

#### 456 **Supporting information**

457 S1 Fig. The relationships among biotic ligand model (BLM) input parameters and electrical  
458 conductivity within 764 samples from 93 sites in Korean freshwater.

459 S2 Fig. Comparison of the frequencies of biotic ligand model input variables in test datasets from  
460 United States, Korean, Swedish, and Belgian freshwaters.

461 S3 Fig. Comparison of the predicted no-effect concentrations (PNECs) from the multiple linear  
462 regression and biotic ligand model-based PNECs within the training dataset.

463 S4 Fig. Comparison of the measured electrical conductivity in the monitoring datasets ( $n = 5,682$ )  
464 from Korea, the United States, and Sweden with the electrical conductivity predicted by multiple  
465 linear regression.

466 S1 Table. Species- and element-specific parameters of chronic copper biotic ligand models.

467 S2 Table. The multiple linear regression formula for biotic ligand model variables for predicting  
468 electrical conductivity from Korean, Swedish, and United States monitoring databases.

469

470

471

472

473

474

475 **References**

- 476 1. Di Toro DM, Allen HE, Bergman HL, Meyer JS, Paquin PR, Santore RC. Biotic ligand  
477 model of the acute toxicity of metals. 1. Technical basis. Environ Toxicol Chem. 2001;  
478 20(10): 2383–96. <https://doi.org/10.1002/etc.5620201034> PMID: 11596774
- 479 2. De Schamphelaere KA, Janssen CR. A biotic ligand model predicting acute copper toxicity  
480 for *Daphnia magna*: the effects of calcium, magnesium, sodium, potassium, and pH.  
481 Environ Sci Technol. 2002; 36(1):48-54. <https://doi.org/10.1021/es000253sn> PMID:  
482 11817370
- 483 3. Bio-met. Bio-met Bioavailability Tool; UserGuide (Version5.0). 2019. [https://bio-](https://bio-met.net/wp-content/uploads/2019/08/bio-met_Guidance-Document_v5.0_-2019-27-06.pdf)  
484 [met.net/wp-content/uploads/2019/08/bio-met\\_Guidance-Document\\_v5.0\\_-2019-27-06.pdf](https://bio-met.net/wp-content/uploads/2019/08/bio-met_Guidance-Document_v5.0_-2019-27-06.pdf)
- 485 4. WFD UKTAG., Development and use of the copper bioavailability assessment tool (Draft).  
486 SC080021/8a-a; Water Framework Directive United Kingdom Technical Advisory Group:  
487 Scotland. 2012.
- 488 5. Verschoor AJ, Vink JP, Vijver MG. Simplification of biotic ligand models of Cu, Ni, and Zn  
489 by 1-, 2-, and 3-parameter transfer functions. Integr Environ Assess. and Manage. 2012; 8  
490 (4):738–48. <https://doi.org/10.1002/ieam.1298> PMID: 22556098
- 491 6. US EPA. Draft technical support document: recommended estimates for missing water  
492 quality parameters for application in EPA’s biotic ligand model, EPA 820-R-15-106; United  
493 States Environmental Protection Agency Office of Water 4304T: Washington DC. 2016.
- 494 7. McConaghie JB. Technical Support Document: An Evaluation to Derive Statewide Copper  
495 Criteria Using the Biotic Ligand Model, States of Oregon Department of Environmental  
496 Quality: Portland. 2016. <https://doi.org/10.13140/RG.2.2.26803.32804>

- 497 8. Thomas AJ, Petridis M, Walters SD, Gheytassi SM, Morgan RE. Two hidden layers are  
498 usually better than one. In: International conference on engineering applications of neural  
499 networks. Engineering Applications of Neural Networks. 2017; 279-290.  
500 [https://doi.org/10.1007/978-3-319-65172-9\\_24](https://doi.org/10.1007/978-3-319-65172-9_24)
- 501 9. Peters A, Merrington G, De Schamphelaere KA, Delbeke K. Regulatory consideration of  
502 bioavailability for metals: Simplification of input parameters for the chronic copper biotic  
503 ligand model. Integr Environ Assess and Manage. 2011; 7(3):437-44.  
504 <https://doi.org/10.1002/ieam.159> PMID: 21082669
- 505 10. De Schamphelaere KA, Heijerick DG, Janssen CR. Refinement and field validation of a  
506 biotic ligand model predicting acute copper toxicity to *Daphnia magna*. Comp Biochem  
507 Physiol Part C: Toxicol Pharmacol. 2002; 134:243–58. [https://doi.org/10.1016/S1532-](https://doi.org/10.1016/S1532-0456(02)00087-X)  
508 [0456\(02\)00087-X](https://doi.org/10.1016/S1532-0456(02)00087-X) PMID: 12356531
- 509 11. ECHA. Voluntary Risk Assessment of Copper, Copper II Sulphate Pentahydrate,  
510 Copper(I)Oxide, Copper(II)Oxide, Dicopper Chloride Trihydroxide. European Union Risk  
511 Assessment Report, European Copper Institute. 2008.
- 512 12. De Schamphelaere KA, Janssen CR. Development and field validation of a biotic ligand  
513 model predicting chronic copper toxicity to *Daphnia magna*. Environ Toxicol Chem. 2004;  
514 23(6):1365–75. <https://doi.org/10.1897/02-626> PMID: 15376521
- 515 13. Nys C, Regenmortel TV, Janssen CR, Oorts K, Smolders E, De Schamphelaere KA. A  
516 framework for ecological risk assessment of metal mixtures in aquatic systems. Environ  
517 Toxicol Chem. 2018; 37(3):623-42. <https://doi.org/10.1002/etc.4039> PMID: 29135043
- 518 14. Kingma DP, Ba J. Adam: A method for stochastic optimization. CoRR. 2015; 1412.6980.  
519 <https://arxiv.org/pdf/1412.6980.pdf>

- 520 15. Nair V, Hinton GE, Rectified linear units improve restricted boltzmann machines.  
521 International Conference on Machine Learning: Proceedings of the 27th International  
522 Conference on International Conference on Machine Learning. Omnipress. 2010; 807-814.  
523 <http://dblp.uni-trier.de/db/conf/icml/icml2010.html#NairH10>
- 524 16. Schmidt-Hieber J. Nonparametric regression using deep neural networks with ReLU  
525 activation function. Ann Statist. 2020; 48 (4):1875-97. <https://doi.org/10.1214/19-AOS1875>
- 526 17. van Vlaardingen PL, Traas TP, Wintersen AM, Aldenberg T. ETX 2.0 A Program to  
527 Calculate Hazardous Concentrations and Fraction Affected, Based on Normally Distributed  
528 Toxicity Data, RIVM report 601501028; National Institute for Public Health and the  
529 Environment (RIVM): Bilthoven. 2004.
- 530 18. Natural Environment Research Council. Windermere Humic Aqueous Model; Use's Guide  
531 (Version 7). Oxfordshire, UK. 2012.
- 532 19. US EPA. Aquatic Life Ambient Freshwater Quality Criteria-Copper, EPA-822-R-07-001;  
533 United States Environmental Protection Agency Office of Water 4304T: Washington DC.  
534 2007.
- 535 20. Swedish Environmental Research Institute. Testing the biotic ligand model for Swedish  
536 surface water conditions - a pilot study to investigate the applicability of BLM in Sweden,  
537 IVL Report B1858; IVL Swedish Environmental Research Institute Ltd.: Stockholm. 2009.
- 538 21. Kim JK, Shin M, Jan C, Jung S, Kim B. Comparison of TOC and DOC distribution and the  
539 oxidation efficiency of BOD and COD in several reservoirs and rivers in the Han River  
540 system. J Korean Soc Water Environ. 2007; 23(1):72-80.



541 22. Sobczak P, Rosińska A. Concentration of total organic carbon and Its fractions in surface  
542 water in Poland and Germany. Proceedings. 2020; 51(1):35.

543 <https://doi.org/10.3390/proceedings2020051035>

544

545

546

547

548

549

550

551

552

553

554

555

556

557

558

559

560

561

562

563 **List of figures:**

564 **Fig 1.** Domain range of input variables in the training dataset used for the development of DNN  
565 (deep neural network-based) models as PNEC estimation tools. The dashed lines indicate a factor  
566 of five from the linear relationships between variables in Korean freshwaters. The first generated  
567 data (cross) are shown in Panel A. The selected data (cross) from the generated data and with the  
568 data removed (triangles) outside the domain range are shown in Panel B. The generated electrical  
569 conductivity data (cross) added to the selected data are shown in Panel C.

570 **Fig 2.** The training and validation results for the DNN(a) model with all BLM variables (A),  
571 DNN(b) with all BLM variables except alkalinity (B), and DNN(c) with the three variables of pH,  
572 DOC, and electrical conductivity (C). The average loss per epoch for the training and validation  
573 steps is shown in the right panels. The validation for the three different types of DNN models  
574 within the training dataset is shown in the left panels. The blue solid line indicates loss per epoch  
575 for training steps, and the red dashed line indicates loss per epoch for validation steps. The black  
576 solid line indicates a perfect match between the simulated and predicted BLM-based PNECs. The  
577 black dotted line indicates an error of a factor of two between simulated and predicted BLM-based  
578 PNECs. Adj.  $r^2$  = adjusted  $r^2$  value.

579 **Fig 3.** Radar chart showing the ratios of pH and log<sub>10</sub> values (different BLM input variables) of  
580 four different test datasets to those of the training dataset. The BLM input variables in the training  
581 dataset are marked by light shading. The BLM variable ratios in the test datasets are marked as the  
582 95<sup>th</sup> percentile within the test datasets by dark shading. Train = training dataset; KR = Korean  
583 freshwater; BEL = Belgian freshwater; US = United States freshwater; SWE = Swedish freshwater.

584 **Fig 4.** Comparison of the test results of the surrogate models for copper BLM-based PNECs in  
585 Korean freshwater. The BLM-based PNECs were derived from 764 individual samples collected

586 in 2014, 2015, and 2016. Panels A, B, and C show PNECs (plus) estimated by the deep neural  
587 network-based models DNN(a), DNN(b), and DNN(c), respectively. Panels D, E, and F show  
588 PNECs (open circle) estimated by Bio-met, mBAT, and PNEC-pro, respectively. Adj.  $r^2$  = adjusted  
589  $r^2$  value.

590 **Fig 5.** Comparison of the test results of the surrogate models for copper BLM-based PNECs in  
591 Swedish freshwater. The BLM-based PNECs were derived from 4,639 individual samples (999  
592 river samples, 1,914 Malar Lake samples, and 1,726 tributary samples) collected in the Swedish  
593 river monitoring program of the Swedish University of Agricultural Sciences from 1997 to 2020.  
594 Panels A, B, and C show PNECs (plus) estimated by deep neural network-based DNN(a), DNN(b),  
595 and DNN(c), respectively. Panels D, E, and F show PNECs (open circle) estimated by Bio-met,  
596 mBAT, and PNEC-pro, respectively. Adj.  $r^2$  = adjusted  $r^2$  value.

597 **Fig 6.** Comparison of the test results of the surrogate models for copper BLM-based PNECs in  
598 United States freshwater. The BLM-based PNECs were derived from 363 samples collected by  
599 the Oregon Department of Environmental Quality Water Monitoring Data Portal and the National  
600 Waters Information System. Panels A, B, and C show PNECs (plus) estimated by the deep neural  
601 network-based models DNN(a), DNN(b), and DNN(c), respectively. Panels D, E, and F show  
602 PNECs (open circle) estimated by Bio-met, mBAT, and PNEC-pro, respectively. Adj.  $r^2$  = adjusted  
603  $r^2$  value.

604 **Fig 7.** Comparison of the test results of the surrogate models for copper BLM-based PNECs in  
605 Belgian freshwater. The BLM-based PNECs were derived from 3,187 individual samples collected  
606 by Nys et al. (2018). Panels A, B, and C show PNECs (plus) estimated by the deep neural network-  
607 based models DNN(a), DNN(b), and DNN(c), respectively. Panels D, E, and F show PNECs (open  
608 circle) estimated by Bio-met, mBAT, and PNEC-pro, respectively. Adj.  $r^2$  = adjusted  $r^2$  value.

609

610

611

612

613

614

615

616

617

618

619

620

621

622

623

624

625

626

627

628

629

630

631 Fig 1

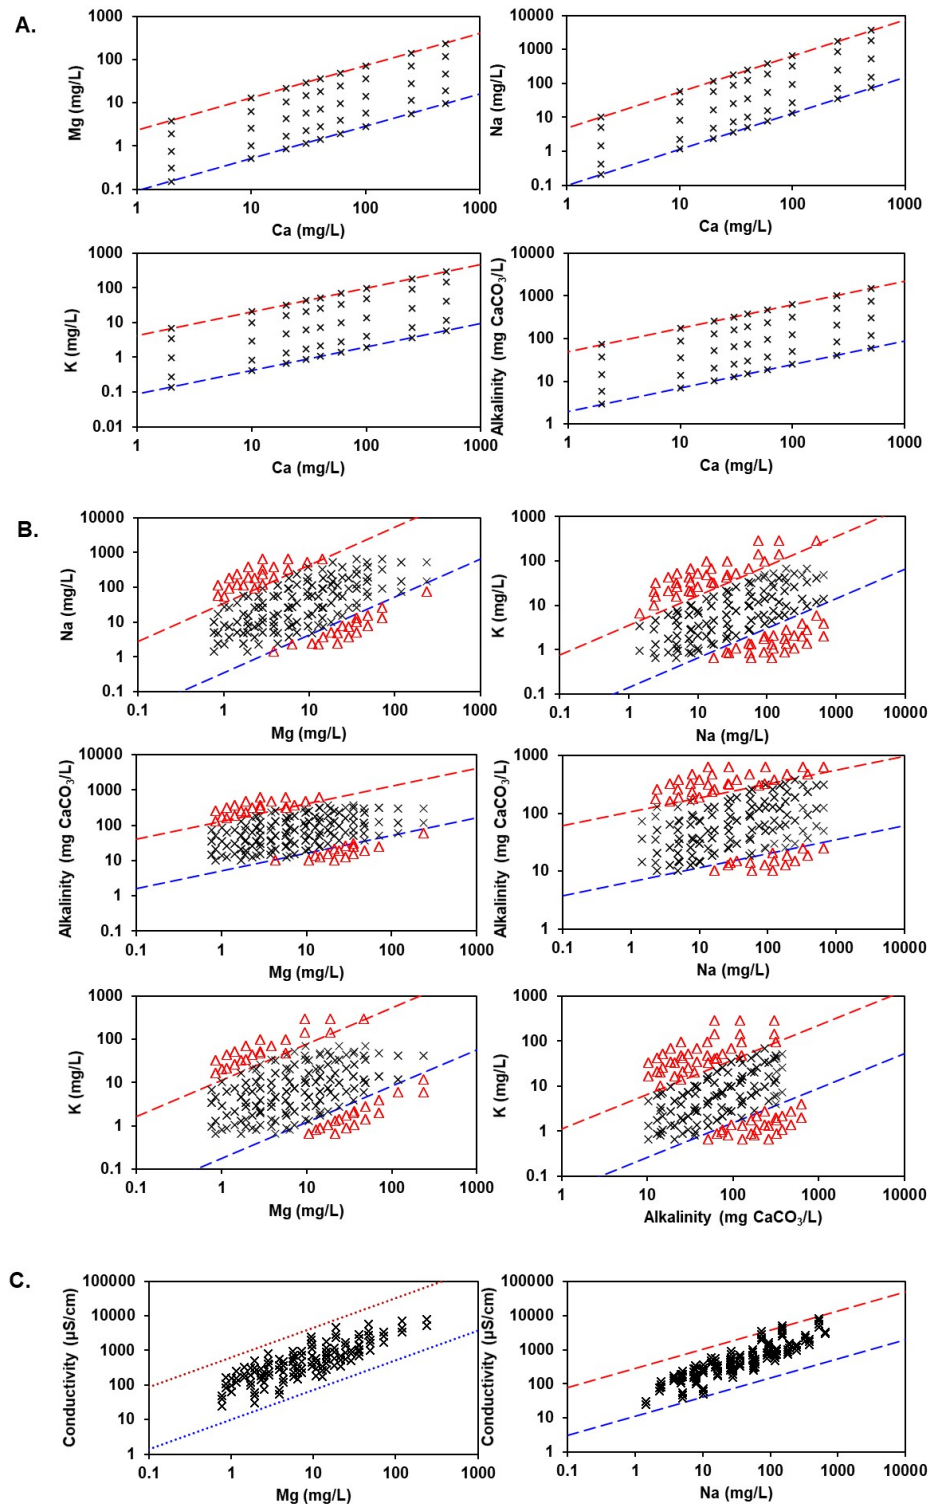

632

633

634 Fig 2

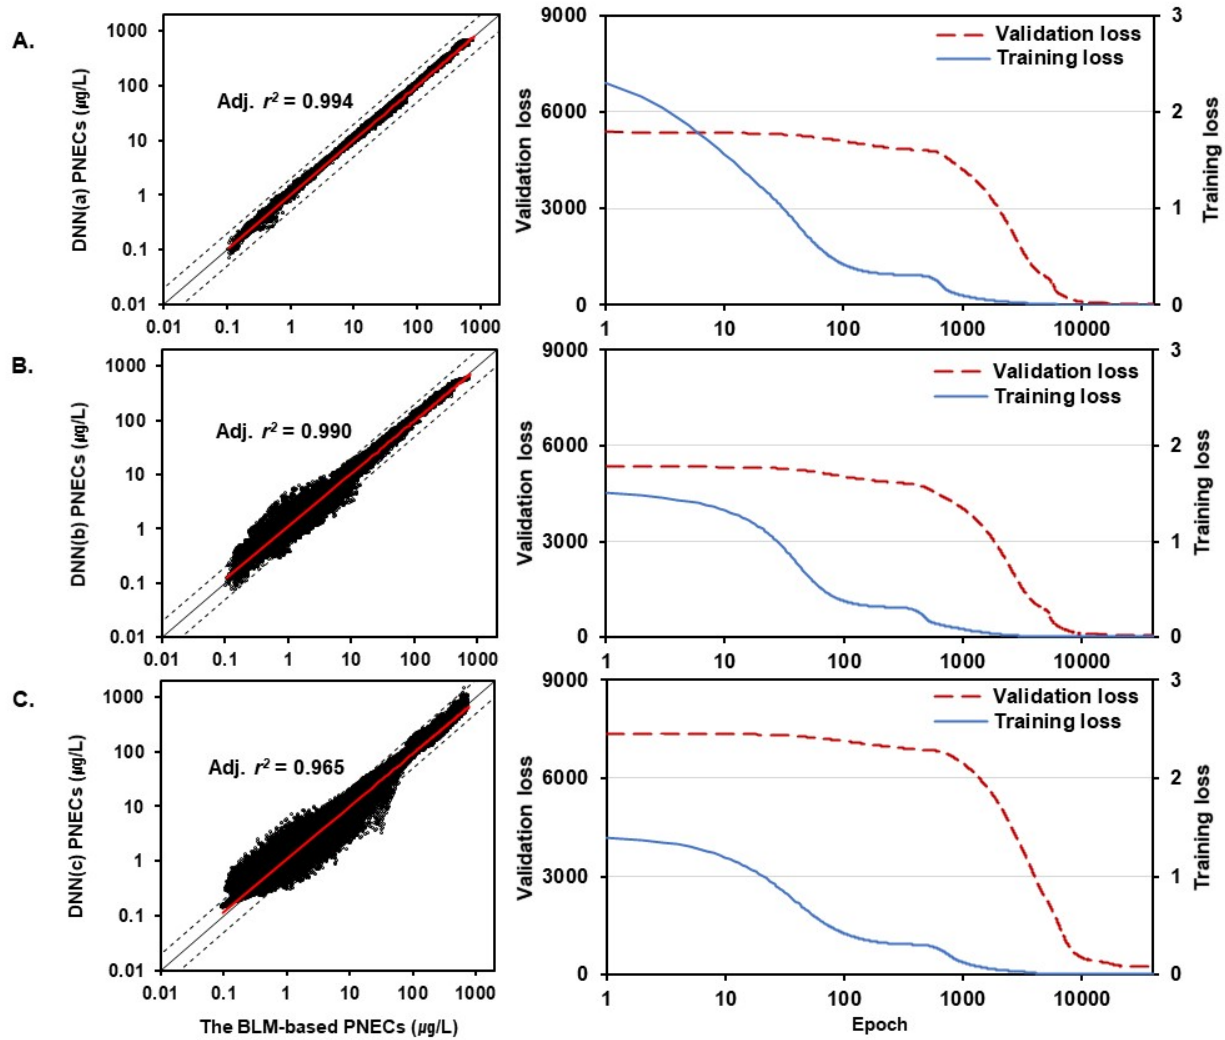

635

636

637

638

639

640

641

642

643 Fig 3

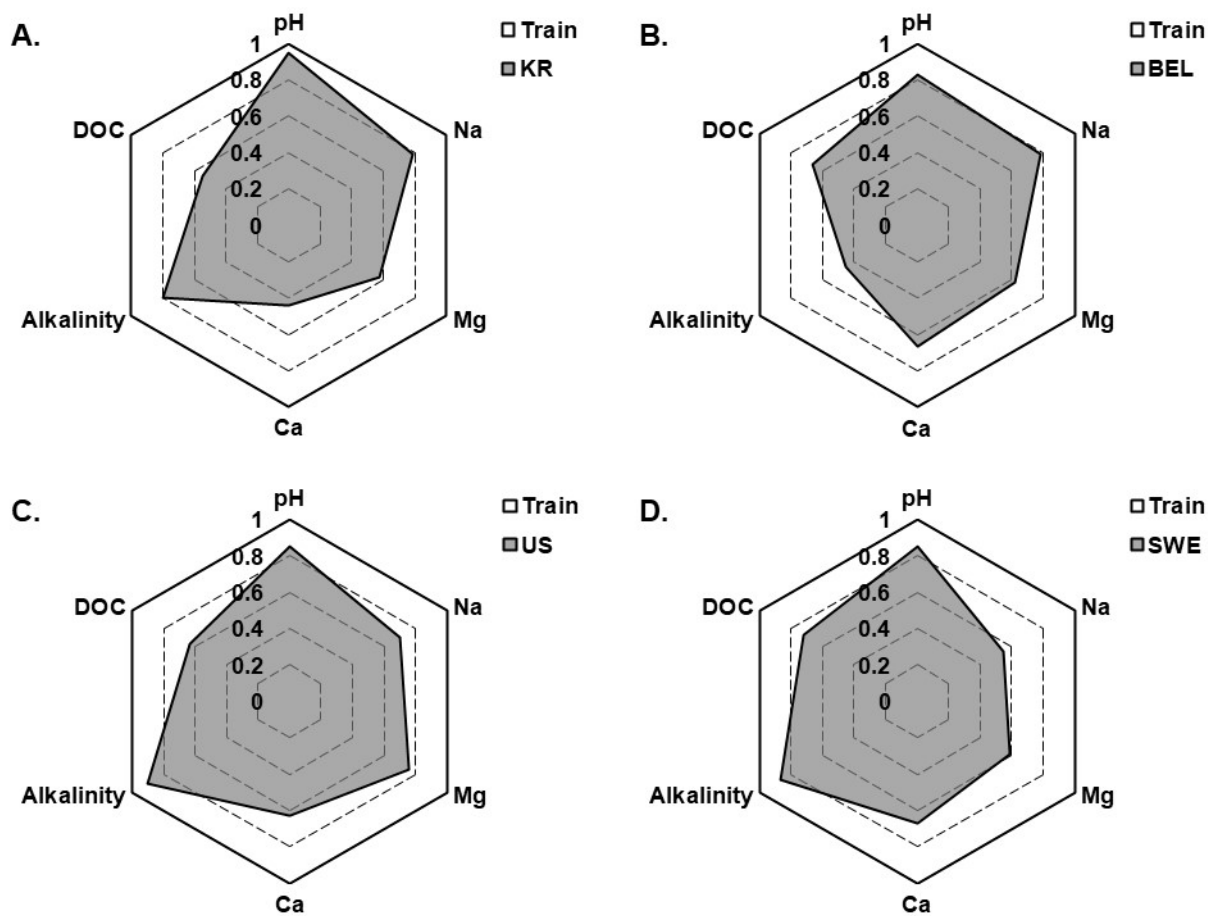

644

645

646

647

648

649

650

651

652

653

654 Fig 4

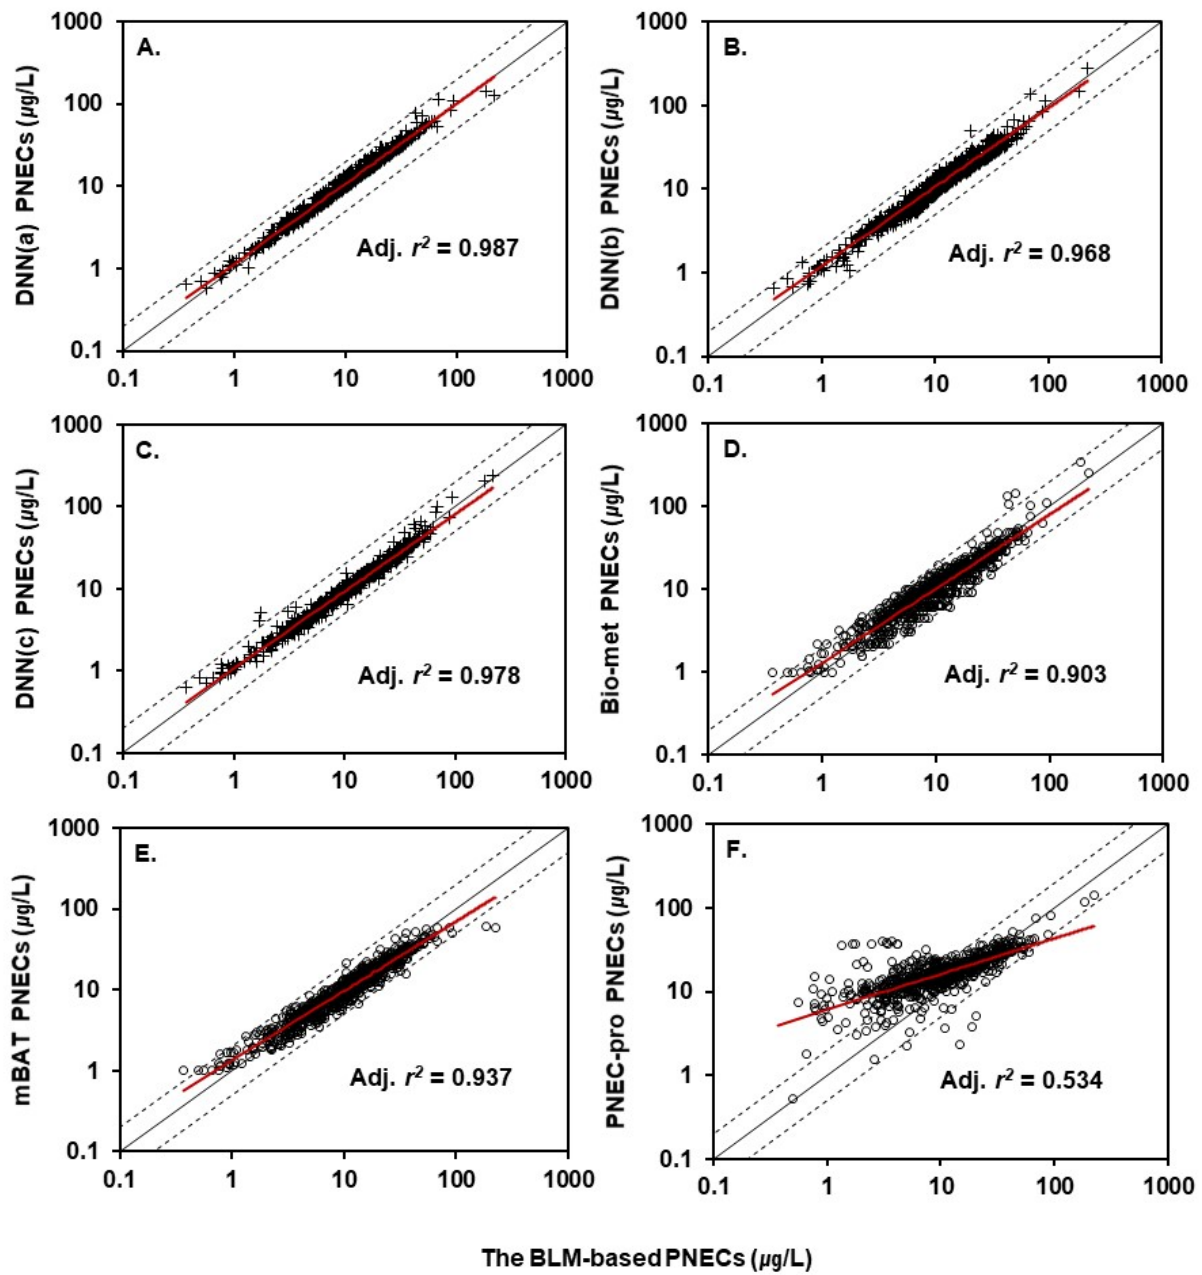



660 Fig 5

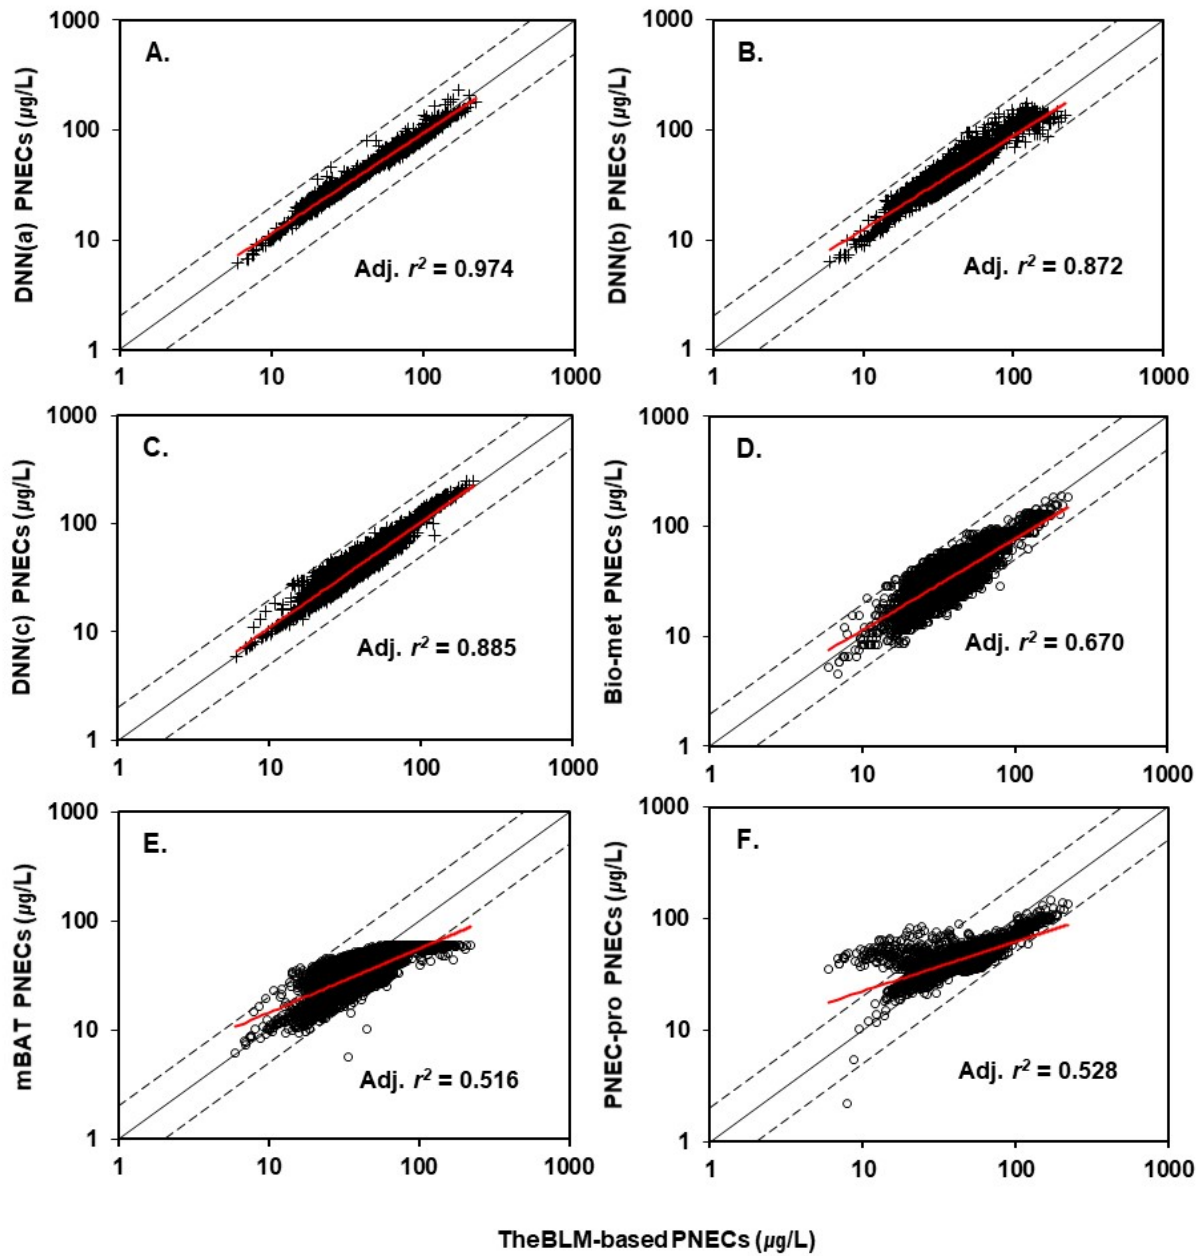

661

662

663

664

665

666 Fig 6

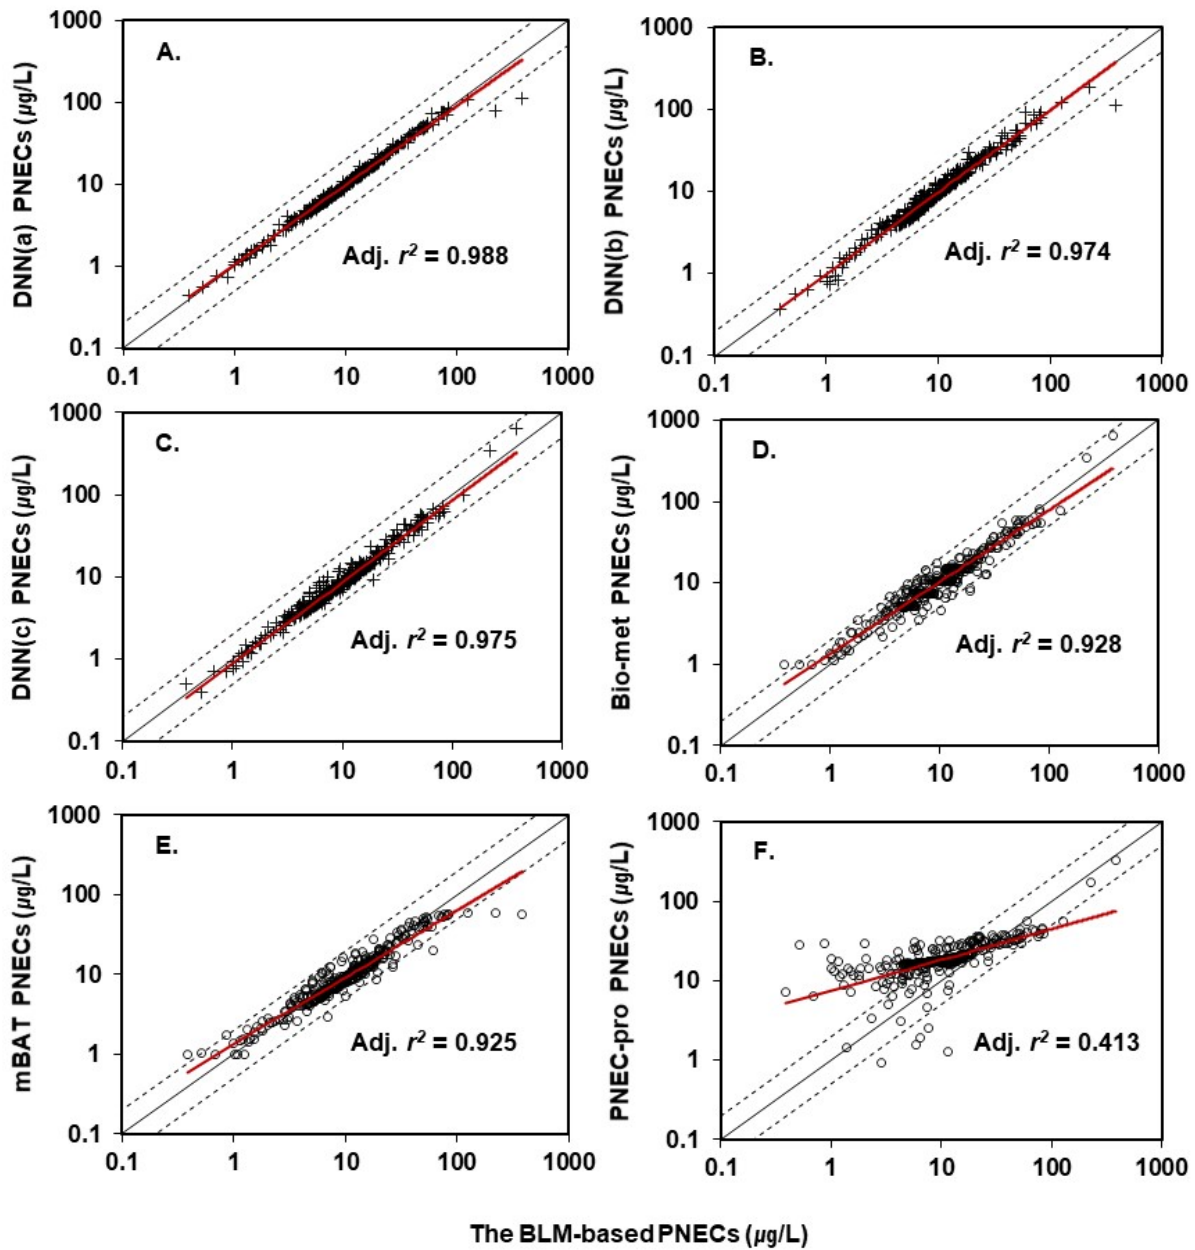

667

668

669

670

671

672 Fig 7

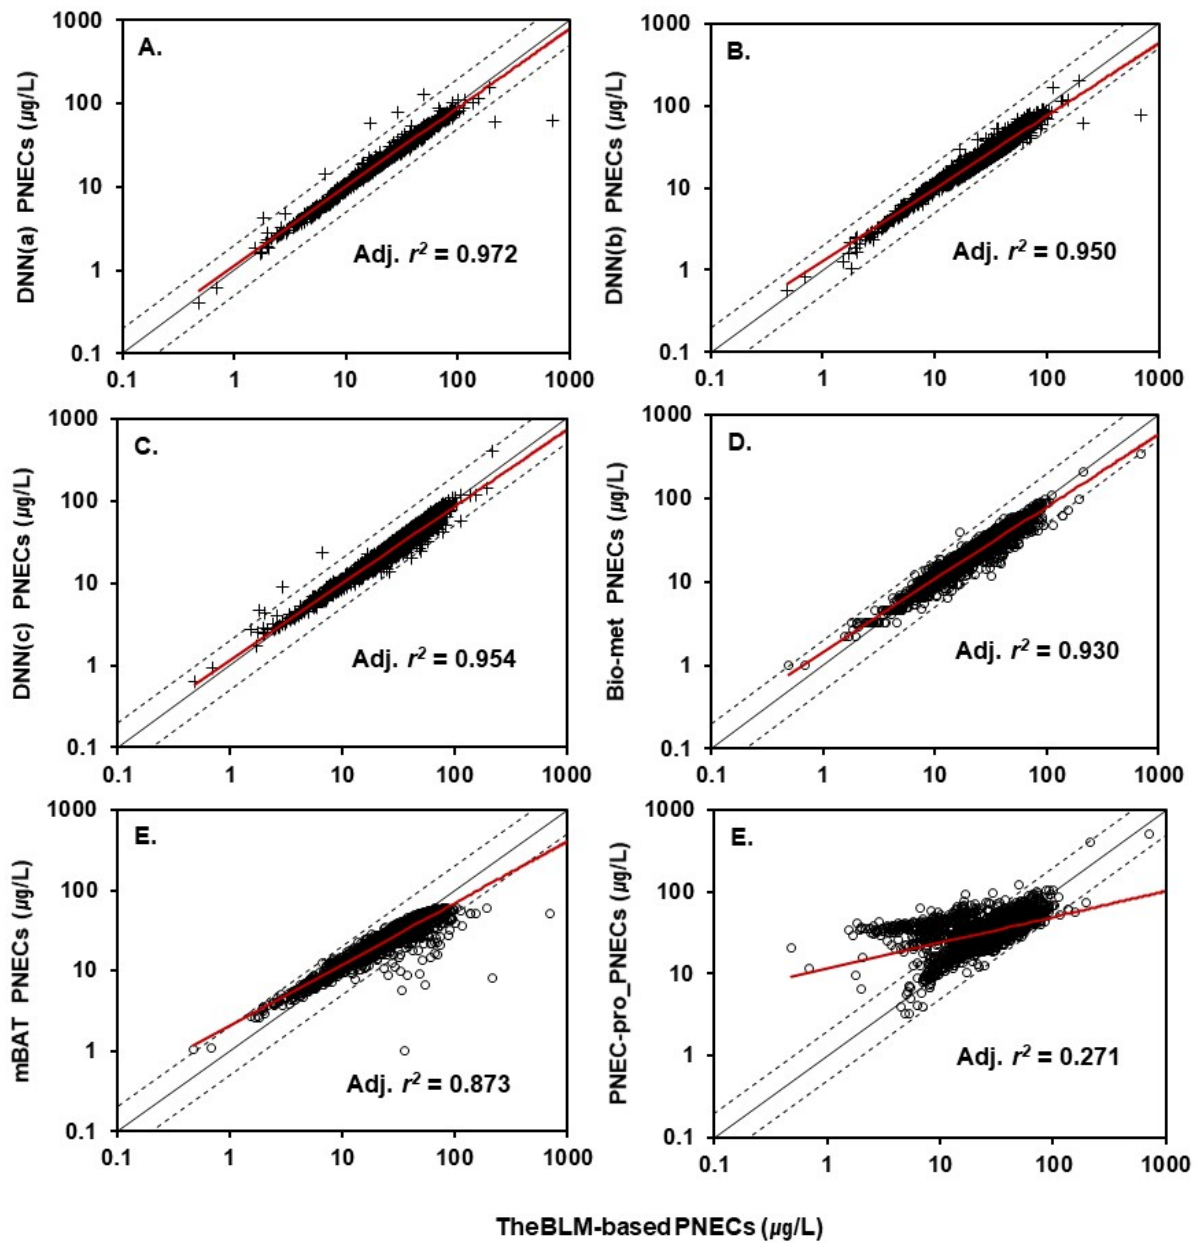

673

674

675

676

677

678 **Table 1.** Ranges for deep learning hyperparameter optimization and hyperparameter  
679 configuration.

| Hyperparameter                        | Value                    | Search range                                                                                              |
|---------------------------------------|--------------------------|-----------------------------------------------------------------------------------------------------------|
| Learning rate                         | 0.005                    | 0.1, 0.01, 0.005, 0.001, 0.0005                                                                           |
| Optimization method                   | AdaMax                   | AdaM, AdaMax, SGD                                                                                         |
| Number of hidden layers               | 3                        | 1, 2, 3, 5                                                                                                |
| Number of hidden units                | {20, 15, 10}             | {20, 15, 10}, {64, 128, 32}                                                                               |
| Activation functions of hidden layers | {sigmoid, sigmoid, ReLU} | {Sigmoid, Sigmoid, Sigmoid},<br>{Sigmoid, Sigmoid, ReLU},<br>{ReLU, ReLU, Sigmoid},<br>{ReLU, ReLU, ReLU} |
| Batch size                            | Maximum                  | Maximum                                                                                                   |
| Number of epochs                      | 20,000                   | 500–40,000                                                                                                |

680 SGD = stochastic gradient descent; ReLU = rectified linear unit

681

682

683

684

685

686

687

688

689

690

691

692

693

694 **Table 2.** Comparison of newly developed deep neural network models with the existing  
 695 predicted no-effect concentration estimation tools

| Model    | Method                           | Training dataset                      | Input variable                  | Test dataset | Adj. $r^2$ | AIC   | RSE   |
|----------|----------------------------------|---------------------------------------|---------------------------------|--------------|------------|-------|-------|
| DNN(a)   | Deep neural network              | Simulation data (n = 107,712)         | pH, Ca, Mg, Na, DOC, Alkalinity | Korea        | 0.987      | -1419 | 0.056 |
|          |                                  |                                       |                                 | US           | 0.988      | -690  | 0.044 |
|          |                                  |                                       |                                 | Sweden       | 0.974      | -7315 | 0.035 |
|          |                                  |                                       |                                 | Belgium      | 0.972      | -4924 | 0.053 |
| DNN(b)   |                                  |                                       | pH, Ca, Mg, Na, DOC             | Korea        | 0.968      | -1125 | 0.078 |
|          |                                  |                                       |                                 | US           | 0.974      | -565  | 0.065 |
|          |                                  |                                       |                                 | Sweden       | 0.872      | -4133 | 0.070 |
|          |                                  |                                       |                                 | Belgium      | 0.950      | -4138 | 0.086 |
| DNN(c)   |                                  |                                       | pH, DOC, EC                     | Korea        | 0.978      | -1255 | 0.069 |
|          |                                  |                                       |                                 | US           | 0.975      | -573  | 0.090 |
|          |                                  |                                       |                                 | Sweden       | 0.885      | -4348 | 0.073 |
|          |                                  |                                       |                                 | Belgium      | 0.954      | -4257 | 0.068 |
| Bio-met  | Look-up table                    | Simulation data (n = 23,054)          | pH, DOC, Ca                     | Korea        | 0.903      | -766  | 0.125 |
|          |                                  |                                       |                                 | US           | 0.928      | -408  | 0.109 |
|          |                                  |                                       |                                 | Sweden       | 0.670      | -2228 | 0.125 |
|          |                                  |                                       |                                 | Belgium      | 0.930      | -3674 | 0.082 |
| mBAT     | Multivariate polynomial function | Simulation data (n = 8,400)           | pH, DOC, Ca                     | Korea        | 0.937      | -909  | 0.107 |
|          |                                  |                                       |                                 | US           | 0.925      | -402  | 0.119 |
|          |                                  |                                       |                                 | Sweden       | 0.516      | -1456 | 0.159 |
|          |                                  |                                       |                                 | Belgium      | 0.873      | -2848 | 0.110 |
| PNEC-pro | Multiple linear regression       | Measured data in Netherland (n = 241) | DOC (pH, Ca, Mg, Na)            | Korea        | 0.534      | -243  | 0.346 |
|          |                                  |                                       |                                 | US           | 0.413      | -74   | 0.407 |
|          |                                  |                                       |                                 | Sweden       | 0.528      | -1504 | 0.138 |
|          |                                  |                                       |                                 | Belgium      | 0.271      | -428  | 0.261 |

696 EC = electrical conductivity; Adj.  $r^2$  = adjusted  $r^2$  value; AIC = Akaike information criterion;  
 697 RSE = residual standard error.

698
