1 **Development of a machine learning model to estimate biotic ligand model-**  
2 **based predicted no-effect concentrations for copper in freshwater**

3

4

5

6

**Jiwoong Chung<sup>1,2</sup>, Geonwoo Yoo<sup>1</sup>, Jinhee Choi<sup>2</sup>, Jong-Hyeon Lee<sup>1\*</sup>**

7

8

9

<sup>1</sup> Environmental Health & Safety Research Institute, EH Research & Consulting Co. Ltd., E

10

TechHive, 410, Jeongseojin-ro, Seo-gu, Incheon, Republic of Korea

11

<sup>2</sup> School of Environmental Engineering, Graduate School of Energy and Environmental System

12

Engineering, University of Seoul, 90 Jeonnong-dong, Dongdaemun-gu, Seoul, Republic of

13

Korea

14

15

\*Present address:

16

Environmental Health & Safety Research Institute, EH Research & Consulting Co. Ltd., E

17

TechHive, 410, Jeongseojin-ro, Seo-gu, Incheon, Republic of Korea

18

19

\*Corresponding author: Tel.: +82 32 0000 0000; Fax: +82 32 0000 0000

20

E-mail address: [jhleecheju@gmail.com](mailto:jhleecheju@gmail.com)

21

22

23

24 **Abstract**

25 The copper biotic ligand model (BLM) has been used for environmental risk assessment by  
26 taking into account the bioavailability of copper in freshwater. However, the BLM-based  
27 environmental risk of copper has been assessed only in Europe and North America, with  
28 monitoring datasets containing all of the BLM input variables. For other areas, it is necessary to  
29 apply surrogate tools with reduced data requirements to estimate the BLM-based predicted no-  
30 effect concentration (PNEC) from commonly available monitoring datasets. To develop an  
31 optimized PNEC estimation model based on an available monitoring dataset, an initial model  
32 that considers all BLM variables, a second model that requires variables excluding alkalinity,  
33 and a third model using electrical conductivity as a surrogate of the major cations and alkalinity  
34 have been proposed. Furthermore, deep neural network (DNN) models have been used to predict  
35 the nonlinear relationships between the PNEC (outcome variable) and the required input  
36 variables (explanatory variables). The predictive capacity of DNN models in this study was  
37 compared with the results of other existing PNEC estimation tools using a look-up table and  
38 multiple linear and multivariate polynomial regression methods. Three DNN models, using  
39 different input variables, provided better predictions of the copper PNECs compared with the  
40 existing tools for four test datasets, i.e., Korean, United States, Swedish, and Belgian  
41 freshwaters. The adjusted  $r^2$  values in all DNN models were higher than 0.95 in the test datasets,  
42 except for the Swedish dataset (adjusted  $r^2 > 0.87$ ). Consequently, the most applicable model  
43 among the three DNN models could be selected according to the data availability in the collected  
44 monitoring database. Because the most simplified DNN model required only three water quality  
45 variables (pH, dissolved organic carbon, and electrical conductivity) as input variables, it is

46 expected that the copper BLM-based risk assessment can be applied to monitoring datasets  
47 worldwide.

48

49 **Keywords:** copper, bioavailability, biotic ligand model (BLM), predicted no-effect  
50 concentrations (PNEC), deep neural network (DNN)

51

52

53

54

55

56

57

58

59

60

61

62

63

64

65

66

67

68

69

70

## 71 **1. Introduction**

72 The copper biotic ligand model (BLM) is used to assess environmental risks and toxicity for  
73 copper based on its bioavailability because the toxicity of copper in aquatic systems is highly  
74 dependent on site-specific water chemistry. The model assumes that the binding of free copper  
75 ions to biotic ligands, together with the competitive effects of major cations, determines copper  
76 toxicity [1, 2]. There are a number of essential input variables (pH, dissolved organic carbon  
77 (DOC), major cations, and alkalinity) required to derive the predicted no-effect concentration  
78 (PNEC) and an effective environmental quality standard based on the copper BLM. However,  
79 monitoring databases containing all BLM input variables are available only for a few regions,  
80 such as the United States and Europe. Regulatory monitoring databases, which are not intended  
81 for use in BLM-based risk assessments, contain only general water quality variables and  
82 hazardous substances as monitoring variables.

83 Although existing PNEC estimation tools can produce uncertain results due to the use of only a  
84 few assessment parameters, a BLM-based risk assessment can be conducted in regions where not  
85 all of the data required as BLM input variables are available. The Bio-met look-up table, the  
86 Environment Agency metal-bioavailability assessment tool (mBAT), which uses a multivariate  
87 polynomial function, and PNEC-pro, which uses multiple linear regression (MLR), require pH,  
88 DOC, and Ca, as the most influential variables to determine BLM-based PNECs [3-5]. However,  
89 the use of Ca as a representative variable of the major cations and alkalinity in existing tools has  
90 not significantly broadened the ecoregion for which BLM-based risk assessments can be applied.  
91 The Ca content may or may not be included as a common regulatory monitoring variable in

92 different ecoregions. There is a need for new input variables that can act as a surrogate for the  
93 major cations and alkalinity within water quality variables while maintaining a good predictive  
94 capacity for the BLM-based PNECs. In this study, electrical conductivity was considered a  
95 surrogate variable and is one of the recommended variables used to estimate the values of a  
96 missing BLM variable [6, 7].

97 New PNEC estimation models should be developed using a method that minimizes the  
98 remaining uncertainty by using the input variables from available monitoring datasets. In this  
99 study, a deep neural network (DNN) was used rather than the statistical methods that are applied  
100 in existing tools. The DNN was expected to provide an optimized predictive capacity for the  
101 nonlinear relationship between the BLM-based PNEC and the BLM input variables. The DNN is  
102 an approximator of universal function. It is an artificial neural network consisting of multiple  
103 hidden layers between the input and output layers, and therefore complex nonlinear relationships  
104 can be modeled by stacking more hidden layers [8].

105 Another factor determining the predictive capacity of the PNEC estimation model is that the  
106 dataset used to develop it must be sufficiently representative of freshwater chemistry. In the  
107 dataset used for the development of Bio-met and mBAT, Peters et al. (2011) assumed that most  
108 of the Mg, Na, and alkalinity could be determined from Ca concentrations [9]. This means that a  
109 dataset consisting of a combination of only three variables (pH, DOC, and Ca) would not cover  
110 the full range of BLM input variables. The dataset used for the development of PNEC-pro is  
111 from a monitoring database from the Netherlands. Further validation is therefore necessary to  
112 apply PNEC-pro to ecoregions with different water chemical properties. As a result, simulation  
113 data with full coverage of the domain of BLM input variables is needed for the development of  
114 the PNEC estimation model.

115 The aim of this study was to develop an optimized PNEC estimation model depending on the  
 116 available monitoring dataset. For this purpose, a realistic training dataset with sufficiently  
 117 representative freshwater chemistry was built to combine all the BLM input variables, and three  
 118 different models with a different number of input variables were proposed by the DNN. The  
 119 most simplified model required only general water quality parameters, such as pH, DOC, and  
 120 electrical conductivity, and could be used for copper BLM-based risk assessments using various  
 121 monitoring datasets that are available worldwide.

122

## 123 2. Materials and methods

### 124 2.1. Calculation of the BLM-based PNECs for copper

125 A general formula for a copper BLM (the *Daphnia magna* BLM) is shown in Eq 1 [10].  
 126 According to the European Union Risk Assessment Report (EU-RAR) [11], the acute *D. magna*  
 127 BLM was used as the chronic fish BLM as follows:

$$\begin{aligned}
 & EC50_{Cu^{2+}} \\
 &= \frac{f_{CuBL}^{50\%}}{(1 - f_{CuBL}^{50\%}) \cdot K_{CuBL}} \cdot \frac{\{1 + K_{CaBL} \cdot (Ca^{2+}) + K_{MgBL} \cdot (Mg^{2+}) + k_{NaBL} \cdot (Na^+) + K_{HBL} \cdot (H^+)\}}{\{1 + R_{CuOHBL} \cdot K_{CuOH} \cdot (OH^-) + R_{CuCO3BL} \cdot K_{CuCO3} \cdot (CO_3^{2-})\}}
 \end{aligned}$$

128 (1)

129 where  $f_{CuBL}^{50\%}$  is the fraction of the total number of copper-binding sites occupied by copper at the  
 130 50% toxic effect, and  $K$  represents biotic ligand constants, such as  $K_{CaBL}$ ,  $K_{MgBL}$ ,  $K_{NaBL}$ ,  $K_{HBL}$ ,  
 131  $R_{CuOHBL}$  ( $K_{CuOHBL} / K_{CuBL}$ ), and  $R_{CuCO3BL}$  ( $K_{CuCO3BL} / K_{CuBL}$ ). The formula for the chronic *D.*  
 132 *magna* BLM is shown in Eq 2 [12].

$$\begin{aligned}
 21d - EC50_{Cu^{2+}} &= \frac{f_{CuBL}^{50\%}}{(1 - f_{CuBL}^{50\%}) \cdot K_{CuBL}} \cdot \frac{1 + 471 \{1 + K_{HBL} \cdot 10^{-6.8}\} \cdot (Na^+) + K_{HBL} \cdot (H^+)}{\{1 + R_{CuOHBL} \cdot K_{CuOH} \cdot (OH^-) + R_{CuCO3BL} \cdot K_{CuCO3} \cdot (CO_3^{2-})\}}
 \end{aligned}$$

133 (2)

134 To calculate the BLM-based PNEC in the training and test datasets, site-specific chronic toxicity  
135 values were calculated from toxicity data for 27 aquatic organisms provided by the EU-RAR  
136 [11] . The biotic ligand and inorganic stability constants for each BLM were applied to three  
137 taxonomic groups, algae, invertebrates, and vertebrates, and are shown in [S1 Table](#). The BLM-  
138 based PNECs were derived by applying an assessment factor of one to the fifth percentile value  
139 (HC5) in the species sensitivity distribution.

140

## 141 ***2.2. Training and test datasets***

142 The training data for DNN model development were built by simulating BLM-based PNECs  
143 based on the combination of BLM input variables, including various water chemistry parameters.

144 A monitoring database of Korean freshwater parameters was used to establish the domain range  
145 of the training dataset, in which real correlations between BLM input variables were taken into  
146 account. The combination of BLM variables was generated from the linear regressions between  
147 each variable, and the extent of the domain range was determined by a factor of five of the linear  
148 regression results.

149 Monitoring databases for four ecoregions were used as test datasets. The Korean dataset  
150 contained 764 individual samples from the Han River, Guem River, Yeongsan River, and  
151 Seomjin River collected from a search of the Environmental Digital Library of the Ministry of  
152 Environment from 2014 to 2016 (<https://library.me.go.kr>). The Swedish dataset contained 4,639  
153 individual samples (999 river samples, 1,914 Malar Lake samples, and 1,726 tributary samples)  
154 collected from the Swedish river monitoring program of the Swedish University of Agricultural  
155 Sciences from 1997 to 2020 (<https://www.slu.se/vatten-miljo>). The United States dataset  
156 included 279 samples collected in the water monitoring datasets of the Oregon Department of

157 Environmental Quality Water Monitoring Data Portal ([https://www.oregon.gov/deq/Data-and-](https://www.oregon.gov/deq/Data-and-Reports/Pages/default.aspx)  
158 [Reports/Pages/default.aspx](https://www.oregon.gov/deq/Data-and-Reports/Pages/default.aspx)) and included 84 samples collected from the draft technical support  
159 document of the United States Environmental Protection Agency (US EPA, 2016). The Belgian  
160 dataset contained 3,187 individual samples reported by Nys et al. (2018) [13].

161

### 162 **2.3. The DNN models**

163 To estimate the BLM-based PNECs in the available monitoring dataset, an initial model that  
164 considered all BLM variables, a second model that required variables excluding alkalinity, and a  
165 third model using pH, DOC, and electrical conductivity were developed by a DNN. Optimization  
166 of the architecture of the DNN models, which is an artificial neural network composed of several  
167 hidden layers between an input layer and an output layer, was performed empirically. The  
168 numbers of layers and nodes, which are the main hyperparameters that determine the DNN  
169 architecture, were established to minimize the training and validation losses during a fixed period  
170 within the search range of hyperparameters, as shown in Table 1. A DNN is generally considered  
171 to have at least two hidden layers, and generalization is better with a feedforward neural network  
172 with two hidden layers than with one layer according to Thomas et al. (2017) [8]. In this study,  
173 the training and validation losses converged to low values when the input layer had three, five, or  
174 six nodes, the three hidden layers had 20, 15, or 10 nodes, and the output layer had one node. In  
175 addition, these losses decreased stably at a learning rate of 0.005. If the learning rate was 0.1, the  
176 losses did not decrease, and if it was less than 0.0001, the losses decreased slowly. The loss  
177 values for training were calculated as follows:

$$\sum_{l=1}^n \{\log_{10}(\text{the BLM\_based PNEC}) - \log_{10}(\text{the predicted PNEC by DNN})\}^2$$



178 (3)

179 Losses are reduced more by the AdaMax algorithm, which is a variant of the AdaM algorithm  
180 based on the infinity norm, than by the AdaM algorithm and the stochastic gradient descent  
181 method [14]. The AdaMax algorithm extends the part of the algorithm that adjusts the learning  
182 rate based on the  $L^2$  norm in the AdaM algorithm to the  $L^p$  norm.

183 Two different types of activation functions were considered for the DNNs. The sigmoid  
184 activation function has traditionally been used as a bounded and monotonically increasing  
185 differentiable function. As a remedy for vanishing gradients, the rectified linear unit (ReLU)  
186 function [15] has computational advantages over the sigmoid activation function, according to  
187 Schmidt-Hieber (2020) [16]. The training and validation losses were reduced more reliably when  
188 using the sigmoid function for the first and second hidden layers, and ReLU for the last hidden  
189 layer, than when using ReLU for all layers. The epoch, which is the number of iterations of the  
190 process of updating the neural network parameters to the loss decreases, was 20,000. For training  
191 the dataset, 70% of the randomly shuffled data were used for training and the remaining 30% for  
192 validation. The DNN models were implemented using Pytorch version 1.8.1 in Python v3.7  
193 software.

194

#### 195 ***2.4. Data Treatment and Statistics***

196 The HC5 for the derivation of PNEC for copper was calculated assuming a log-normal  
197 distribution of species sensitivity in the ETX 2.0 software [17]. Normality tests, such as the  
198 Anderson–Darling, Kolmogorov–Smirnov, and Cramer von Mises tests, were performed using  
199 ETX 2.0 software. A speciation model, such as the Windermere Humic Aqueous Model 7  
200 (WHAM), is required to estimate the site-specific free ion activities for copper and the major

201 cations in training and test datasets [18]. Some element-specific parameters were changed from  
202 WHAM-provided values to copper BLM-provided constants (S1 Table). Humic acid and fulvic  
203 acid, as input variables of the WHAM, were assumed to be 0.001% and 50% of the DOC  
204 concentration, respectively, according to the EU-RAR [11]. The predictive capacity of PNEC  
205 estimation tools, including the newly developed DNN models, was compared using the Akaike  
206 information criterion (AIC), residual standard error (RSE), and adjusted  $r^2$  value. All statistics  
207 were calculated using Python v3.5 software.

208 MLR was performed to determine the appropriate electrical conductivity in the training dataset  
209 from the combination of BLM variables, i.e., Ca, Mg, Na, pH, and DOC. The most relevant  
210 BLM variables were selected for inclusion in the MLR function for electrical conductivity. The  
211 general formula for MLR was as follows:

$$\text{Electrical Conductivity} = a + (b \cdot \text{variable}_1) + (c \cdot \text{variable}_2) + \dots + (f \cdot \text{variable}_5)$$

212 (4)

213 The calculation was completed using a function in R ([The R Project for Statistical Computing](#)).  
214 Whether the predictive capacity of the MLR model was dependent on the type of BLM variable  
215 considered was determined by the AIC [19].

216

### 217 **3. Results**

#### 218 ***3.1. The development of DNN model for the estimation of the BLM-based PNECs***

219 The DNN models were developed using the training data for the simulated BLM-based PNECs  
220 with various combinations of BLM input variables, in which the domain ranges of input  
221 variables reflected water chemistry monitoring data from the northern hemisphere. The real  
222 correlations among the BLM variables shown in S1 Fig were taken into account to establish the

223 domain range of the training dataset. The extent of these domain ranges was determined by a  
224 factor of five of the linear regression results between each variable. The Mg, Na, and K  
225 concentrations and alkalinity were generated from the correlations with Ca (Fig 1A). From the  
226 combination of these generated variables, only combinations within the domain range were  
227 selected to calculate the BLM-based PNEC for copper (Fig 1B). The pH and DOC ranges were  
228 5.5–9.9 and 0.1–50 mg L<sup>-1</sup>, respectively.

229 The electrical conductivity estimation model for generating electrical conductivity values from  
230 the training dataset was developed by MLR with simplified BLM input variables, using three  
231 monitoring datasets ( $n = 5,682$ ) for Korean, Swedish, and the United States freshwaters. Each of  
232 the three models required a different number of BLM variables. The first model considered five  
233 BLM variables (Ca, Mg, Na, alkalinity, and pH), the second model excluded pH, and the third  
234 model excluded pH and alkalinity. The S2 Table shows good agreement between the measured  
235 electrical conductivity and the electrical conductivity calculated by the three models (adjusted  $r^2$   
236 = 0.959–0.959). As a result, electrical conductivity values in the training dataset were generated  
237 using a simplified three-variable (Ca, Mg, and Na) model (Fig 1C).

238 To develop an optimized PNEC estimation model based on an available monitoring dataset, the  
239 DNN(a) model that considered all BLM variables, the DNN(b) model that required all variables  
240 excluding alkalinity, and the DNN(c) model that used electrical conductivity as a surrogate of the  
241 major cations and alkalinity, were proposed. All of the different DNN models showed a sharp  
242 decrease in validation loss after approximately 1,000 epochs without overfitting and flattened out  
243 after 10,000 epochs (Fig 2). When the PNECs predicted by the DNN(a), DNN(b), and DNN(c)  
244 models within the training dataset were compared with the BLM-based PNECs, the adjusted  $r^2$

245 values were 0.994, 0.990, and 0.965, respectively. As a result, all of the DNN models used in this  
246 study were considered sufficiently trained until two constant losses occurred.

247

### 248 ***3.2. Comparison of PNEC estimation tools with newly developed DNN models***

249 The four test datasets, Korean, United States, Belgian, and Swedish freshwaters, were used to  
250 evaluate the predictive capacity of the DNN models and the existing PNEC estimation tools. The  
251 differences in water chemistry properties among these four test datasets are shown in [S2 Fig](#) as a  
252 histogram of the frequency versus concentration of each variable. Korean freshwater had the  
253 lowest Ca and DOC concentrations (95<sup>th</sup> percentile: 16 mg Ca L<sup>-1</sup> and 8.5 mg DOC L<sup>-1</sup>) and the  
254 highest pH (95<sup>th</sup> percentile: 8.9). Swedish freshwater had the lowest sodium concentration (95<sup>th</sup>  
255 percentile: 26 mg Na L<sup>-1</sup>), and Belgian freshwater had the lowest alkalinity (95<sup>th</sup> percentile: 13  
256 mg CaCO<sub>3</sub> L<sup>-1</sup>). United States freshwater had the highest alkalinity (95<sup>th</sup> percentile: 169 mg  
257 CaCO<sub>3</sub> L<sup>-1</sup>). The application coverage of the DNN model for various water chemistry conditions  
258 was dependent on the range of variables in the simulated training dataset. This dataset was  
259 considered to be more broadly representative of the water chemistry range compared with the  
260 test datasets, and these results affected the predictive capacity of the DNN models ([Fig 3](#)).

261 Evaluation of the predictive capacity of the three DNN models in this study and comparison of  
262 the results with those obtained by existing tools were performed for four ecoregions (test  
263 datasets), and the results are shown in [Table 2](#). For Korean freshwater, comparison of the  
264 predictive capacity among the PNEC estimation models is shown in [Fig 4](#). The DNN(a) model  
265 provided good predictions (adjusted  $r^2 = 0.987$ ,  $p < 0.01$ ). The DNN(b) and DNN(c) models  
266 provided predictions similar to those of DNN(a) (adjusted  $r^2 = 0.968$  and  $0.978$ , respectively,  $p <$   
267  $0.01$ ). Among the existing models, PNEC-pro provided less reliable predictions (adjusted  $r^2 =$

268 0.537,  $p < 0.05$ ), whereas Bio-met and mBAT provided good predictions (adjusted  $r^2 = 0.904$  and  
269 0.937,  $p < 0.01$ ).

270 For Swedish freshwater, a comparison of the predictive capacity between the PNEC estimation  
271 models is shown in [Fig 5](#). The DNN(a) model also provided good predictions (adjusted  $r^2 =$   
272 0.974,  $p < 0.01$ ). The coefficients of determination of the DNN(b) and DNN(c) models were  
273 similar (adjusted  $r^2 = 0.872$  and 0.885, respectively,  $p < 0.01$ ), and were lower than those of  
274 DNN(a). For the existing models, the coefficients of determination were lower than 0.7 (adjusted  
275  $r^2 = 0.670$  for Bio-met, 0.529 for PNEC-pro, and 0.516 for mBAT,  $p < 0.05$ ).

276 For United States freshwater, a comparison of the predictive capacity among the PNEC  
277 estimation models is shown in [Fig 6](#). The three DNN models provided good predictions (adjusted  
278  $r^2 = 0.989$  for DNN(a), 0.974 for DNN(b), and 0.975 for DNN(c),  $p < 0.01$ ). Among the existing  
279 tools, Bio-met and mBAT provided good predictions (adjusted  $r^2 = 0.929$  and 0.926, respectively,  
280  $p < 0.01$ ), whereas PNEC-pro provided less reliable predictions (adjusted  $r^2 = 0.421$ ,  $p < 0.05$ ).

281 For Belgian freshwater, a comparison of the predictive capacity among the PNEC estimation  
282 models is shown in [Fig 7](#). The coefficients of determination of the three DNN models and Bio-  
283 met were  $> 0.9$  (adjusted  $r^2 = 0.972$  for DNN(a), 0.95 for DNN(b), 0.954 for DNN(c), and 0.93  
284 for Bio-met,  $p < 0.01$ ). The mBAT also provided good predictions (adjusted  $r^2 = 0.873$ ,  $p < 0.01$ ),  
285 whereas PNEC-pro provided less reliable predictions (adjusted  $r^2 = 0.273$ ,  $p < 0.05$ ).

286 Consequently, all PNEC estimation models based on the DNN method provided good  
287 predictions in the four ecoregions ([Table 2](#)). The DNN(a) model using all BLM input variables  
288 had the lowest AIC and RSE values and the highest adjusted  $r^2$ . The DNN(c) model using the  
289 variables of electrical conductivity, pH, and DOC had the second lowest AIC and RSE values

290 and the second highest adjusted  $r^2$ . The DNN(b) model using five BLM variables (excluding  
291 alkalinity) also provided good predictions, which were very similar to those of DNN(c).  
292 Among the existing PNEC estimation tools, the lowest AIC and highest adjusted  $r^2$  values were  
293 obtained for Bio-met, based on the look-up table method, while the second lowest AIC and  
294 second highest adjusted  $r^2$  were obtained for mBAT, based on a multivariate polynomial function  
295 with interaction terms. Compared with the other models, PNEC-pro, based on MLR, had a less  
296 reliable predictive capacity for the test datasets.

297

## 298 **4. Discussion**

### 299 ***4.1. The development of DNN model for the estimation of the BLM-based PNECs***

300 To develop an optimized PNEC estimation model based on available monitoring datasets, the  
301 DNN(a) model that considered all BLM variables, the DNN(b) model that required all variables  
302 excluding alkalinity, and the DNN(c) model that used electrical conductivity as a surrogate of the  
303 major cations and alkalinity were proposed. These three types of BLM-based PNEC estimation  
304 models, using training dataset with various water chemistries, were developed by a DNN to  
305 optimize the prediction of nonlinear relationships between input variables (explanatory variables)  
306 and BLM-based PNECs (dependent variables). The learning result of the DNN(a) model was  
307 predicted to be within a factor of two of that of the BLM-based PNEC for 100% of the data in  
308 the training dataset ( $n = 107,712$ ) (Fig 2). This was an expected result because the DNN used for  
309 model development was a universal approximation function and was the result of the excellent  
310 learning of nonlinear relationships based on large amounts of simulated data. Because simulation  
311 data with full coverage of the domain of input variables were used as the training dataset, there  
312 was no need to use additional validation and test datasets. The learning results of the DNN(b)

313 and DNN(c) models were predicted to be within a factor of two of the BLM-based PNECs for  
314 98.5% and 88.3% of the data, respectively.

315 Among the existing PNEC estimation tools, mBAT was developed using a multivariate  
316 polynomial function to predict the nonlinear relationships between input variables (pH, DOC,  
317 and Ca) and the BLM-based PNECs for copper [4]. Although two functions were proposed for  
318 Ca ( $>$  and  $<$  6 mg L<sup>-1</sup>) to counteract low Ca concentrations, the validation results of the  
319 prediction accuracy for PNECs within the dataset used for development have not been described.  
320 PNEC-pro was developed by a simple MLR using monitoring data ( $n = 241$ ) from the  
321 Netherlands and provides validation results for the prediction accuracy (adjusted  $r^2 = 0.882$ ) [5].  
322 After determining the MLR function from the learning data of this study, the validation results  
323 are shown in [S3 Fig](#). The adjusted  $r^2$  value was 0.838, which was lower than that of the DNN  
324 models (adjusted  $r^2 = 0.965$  for DNN(c) using three variables, [Fig 2C](#)). As a result, the DNN  
325 models including the most simplified model can be considered the most appropriate method to  
326 optimize the prediction of the nonlinear relationship between the required input variables and the  
327 BLM-based PNECs in a large training dataset reflecting water chemistry monitoring data from  
328 the northern hemisphere.

329

#### 330 ***4.2. Comparison of existing PNEC estimation tools with newly developed DNN models***

331 A copper BLM-based PNEC has been proposed in Europe and the United States for  
332 environmental risk assessment, taking into account the site-specific bioavailability of copper [11,  
333 19]. To derive the BLM-based PNEC, monitoring datasets including all BLM input variables (pH,  
334 DOC, major cations, and alkalinity) are essential for estimating water chemistry speciation, such  
335 as the activity of free copper ions, copper speciation, and major cations. However, these datasets

336 are available only in a few regions, such as the United States and Europe. Because some BLM  
337 variables may be missing from available datasets, several methods have been proposed to  
338 estimate the values of the missing variables [6, 9].

339 To simulate the derivation of BLM-based PNECs that require all of these input variables,  
340 simplified and user-friendly PNEC estimation tools using a reduced number of variables (e.g.,  
341 Bio-met, mBAT, and PNEC-pro) have been proposed [3-5]. Among these tools, the minimum  
342 data requirements for Bio-met and mBAT are pH, DOC, and Ca. pH affects copper toxicity in  
343 aquatic organisms and is routinely measured in field samples using a variety of water quality  
344 measurement instruments. DOC in freshwater can bind copper and reduce the interaction  
345 between free copper ions and aquatic organisms. Non-linear relationships among pH, copper  
346 toxicity, and the binding properties of DOC have been reported in EU-RARs [11]. Although the  
347 Ca concentration or hardness is a less influential variable than pH and DOC, it is a more  
348 statistically effective variable for PNEC than other cations and alkalinity [5]. In addition, it has  
349 been reported that an increase in the Ca concentration does not result in an increase in PNEC [9].  
350 However, it may or may not be included as a general water quality variable in regulatory  
351 monitoring databases. Therefore, Bio-met and mBAT, which only require the concentration of Ca  
352 among the major cations, do not significantly broaden the ecoregion where a BLM-based risk  
353 assessment can be applied. Because Ca, Mg, and Na are monitoring variables that can be  
354 measured by the same analyzer in one sample, it may be more efficient to improve the predictive  
355 capacity by using the concentrations of all available major cations. In PNEC-pro, if Ca is not  
356 considered an input variable, the accuracy (adjusted  $r^2$ ) is less than 0.8 [5].

357 As a result, to apply a BLM-based risk assessment over a wider ecoregion, the major cations  
358 should be excluded from the minimum data requirements, and surrogate variables contributing to



359 the good predictions for the BLM-based PNEC are required. In this study, electrical conductivity  
360 was considered a surrogate of the major cations and alkalinity. Electrical conductivity is typically  
361 included as a water quality variable in general regulatory water quality-monitoring databases.  
362 Electrical conductivity is one of the variables recommended for estimating the concentrations of  
363 missing BLM variables via its linear relationships with BLM variables [6, 7].

364 In the test datasets (four ecoregions), PNEC predictions were less reliable by the existing PNEC  
365 estimation tools than by the three different DNN models (Table 2). This was likely because the  
366 training datasets used for the development of each existing tool were not sufficiently  
367 representative of the different water chemistries, and the statistical and look-up table methods  
368 used for PNEC estimation provided limited predictive capacities for the nonlinear relationships  
369 between PNEC and BLM variables. Therefore, in this study, a training dataset representative of  
370 various freshwater chemistries was built for the DNN models. Its subsequent use resulted in a  
371 wide range of applications and good predictive capacity.

372 To design a representative training dataset, the frequencies of each BLM input variable and their  
373 relationships were investigated in the Korean freshwater monitoring database (S1 Fig). The  
374 domain ranges for water chemistry variables were determined from the abovementioned results  
375 (Fig 1). The pH conditions were generated as continuous values rather than multiple level  
376 conditions with intervals because pH was the only variable that had a non-linear relationship  
377 with PNEC. Another 9,792 combinations of Ca, Mg, Na, K, alkalinity, and DOC were generated  
378 assuming the same pH. Then 9,792 continuous pH variations were generated within the pH  
379 condition interval. These values were randomly arranged and added to the combined data of  
380 other variables.

381 The datasets used to develop the existing tools did not cover the full domain range of BLM input  
382 variables. For the mBAT training dataset, the Mg and Na concentrations and alkalinity were  
383 determined by Ca according to Peters et al. (2011) [9] and therefore consisted of a combination  
384 of only three variables: pH, DOC, and Ca. For the Bio-met training dataset, the Mg concentration  
385 was considered to be Ca-dependent, the Na concentration was considered to be dependent on  
386 four other factors, and alkalinity was determined to be dependent on pH as well as three other  
387 factors. The pH conditions of Bio-met were determined at 21 levels ranging from 6.0 to 8.5,  
388 while mBAT did not describe the pH conditions in detail. PNEC-pro, which was developed using  
389 monitoring data rather than simulation data, requires data from a wider ecoregion than just the  
390 Netherlands, the basis of its development.

391 To generate electrical conductivity data for the training dataset in this study, the use of MLR-  
392 based models to estimate electrical conductivity from BLM input variables has been proposed.  
393 To develop these models, the monitoring datasets from Korea, the United States, and Sweden  
394 were used because they included all BLM input variables and electrical conductivity. The final  
395 estimation model for electrical conductivity using Ca, Mg, and Na in [Table 2](#) had a good  
396 predictive capacity, within a factor of two for 99.2% of the electrical conductivity data measured  
397 in the three ecoregions ( $n = 5,682$ ) ([S4 Fig](#)). As a result, because the range of water chemistry  
398 data in the final training dataset with electrical conductivity covered the ranges of BLM input  
399 variables in the four test datasets (Korean, Swedish, United States, and Belgian freshwaters), it  
400 was considered to be sufficiently representative of the freshwater chemistry ([Fig 3](#)).

401 Better predictions of the copper PNECs were obtained from the three different types of DNN  
402 models trained and validated using the representative simulation training dataset than from the  
403 existing tools in the four test datasets (Korean, United States, Swedish, and Belgian freshwaters).

404 The adjusted  $r^2$  values were higher than 0.95 in all but the Swedish freshwater dataset. Although  
405 the minimum adjusted  $r^2$  value in Swedish freshwater was 0.87, it was higher than the results  
406 obtained using the existing tools. The use of reduced input variables for the DNN(b) and DNN(c)  
407 models in Swedish freshwater, which had a lower pH and major cation concentration compared  
408 with the other regions, was probably why the adjusted  $r^2$  values (0.87 and 0.89, respectively)  
409 were lower than the value of 0.97 obtained with the DNN(a) model using all BLM variables ([S2](#)  
410 [Fig](#)).

411 The mBAT and PNEC-pro predictions were less accurate than those of the DNN models,  
412 indicating that general statistical methods (multivariate polynomial regression and MLR) were  
413 not sufficient for predicting the nonlinear relationships between input variables and PNECs. A  
414 look-up table method, such as Bio-met, was expected to have a higher predictive capacity when  
415 used as the training dataset in this study, while the PNEC calculation performed in Excel  
416 required a considerable amount of time. The water chemistry conditions did not match the  
417 conditions in the training dataset, and its prediction accuracy was expected to be lower than that  
418 calculated by the DNN.

419 An important finding was the similar prediction accuracy in the test datasets of the three DNN  
420 models using different types of input variables to develop optimized PNEC estimation models  
421 depending on the available monitoring datasets. This means that even with reduced input  
422 variables, a good prediction capacity can be expected by a DNN model that includes the key  
423 input variables for a BLM. In particular, the DNN(c) model, which was selected as the most  
424 simplified surrogate tool, was shown to have a predictive capacity similar to that of the DNN(a)  
425 model, which provided the best prediction. Electrical conductivity played an important role as a  
426 variable acting as a surrogate for the major cations and alkalinity. Although there is further scope

427 to reduce the uncertainty in the predicted PNECs by the DNN(c) model at a low pH and Ca  
428 concentration, such as in the Swedish freshwater, it is necessary to assess the environmental risk  
429 for copper using DNN(a) from all measured input variables. Consequently, according to the  
430 variables in the available monitoring databases, the most applicable model could be selected  
431 from among the three DNN models.

432 It is possible to reduce the uncertainty in the BLM-based PNECs estimated by the final surrogate  
433 tool in a specific region using a monitoring database containing the concentration of total organic  
434 carbon (TOC) rather than DOC. Both electrical conductivity and pH can be measured in field  
435 samples using commonly available water quality instruments and are included in most regulatory  
436 monitoring databases. The organic carbon concentration in freshwater is usually measured as  
437 TOC in monitoring databases unless the database is used for the purpose of bioavailability-based  
438 risk assessments. Among the test datasets in this study, the datasets from Korea, the United States,  
439 and Belgium included DOC concentrations for bioavailability-based risk assessments. The DOC  
440 concentration in the Swedish dataset was estimated by applying the 0.8 ratio, which is the  
441 simplest method of estimating DOC from TOC concentrations [11, 20]. However, the DOC  
442 concentration in Korean rivers is 64.3–79% of the TOC concentration, according to Kim et al.  
443 (2007) [21]. For surface waters in Poland and Germany, the DOC concentration range was 80–92%  
444 of the TOC concentration [22]. Thus, the observed DOC may be used to reduce the uncertainty  
445 of the BLM-based PNEC estimated using a surrogate tool.

446

## 447 **5. Conclusion**

448 This study developed three different types of DNN models, each requiring different input  
449 variables, which provide better predictions of the BLM-based PNECs for copper than existing

450 PNEC tools in various ecoregions. The most applicable model among the three DNN models can  
451 be selected according to the available variables in monitoring databases. Furthermore, it is  
452 expected that the most simplified DNN model, using only general water quality variables (pH,  
453 DOC, and electrical conductivity), will enable the copper BLM-based risk assessment to be  
454 applied to monitoring datasets worldwide.

455

#### 456 **Acknowledgments**

457 This work was supported by Korea Environment Industry & Technology Institute (KEITI)  
458 through the Technology Development Project for Safety Management of Household Chemical  
459 Products funded by Korea Ministry of Environment (MOE) (2020002970009, 1485017560)

460

#### 461 **Supporting information**

462 S1 Fig. The relationships among biotic ligand model (BLM) input parameters and electrical  
463 conductivity within 764 samples from 93 sites in Korean freshwater.

464 S2 Fig. Comparison of the frequencies of biotic ligand model input variables in test datasets  
465 from United States, Korean, Swedish, and Belgian freshwaters.

466 S3 Fig. Comparison of the predicted no-effect concentrations (PNECs) from the multiple linear  
467 regression and biotic ligand model-based PNECs within the training dataset.

468 S4 Fig. Comparison of the measured electrical conductivity in the monitoring datasets (n =  
469 5,682) from Korea, the United States, and Sweden with the electrical conductivity predicted by  
470 multiple linear regression.

471 S1 Table. Species- and element-specific parameters of chronic copper biotic ligand models.

472 S2 Table. The multiple linear regression formula for biotic ligand model variables for predicting  
473 electrical conductivity from Korean, Swedish, and United States monitoring databases.

474

475

476

477

478

479

## 480 **References**

- 481 1. Di Toro DM, Allen HE, Bergman HL, Meyer JS, Paquin PR, Santore RC. Biotic ligand  
482 model of the acute toxicity of metals. 1. Technical basis. *Environ Toxicol Chem.* 2001;  
483 20(10): 2383–96. <https://doi.org/10.1002/etc.5620201034> PMID: 11596774
- 484 2. De Schamphelaere KA, Janssen CR. A biotic ligand model predicting acute copper toxicity  
485 for *Daphnia magna*: the effects of calcium, magnesium, sodium, potassium, and pH.  
486 *Environ Sci Technol.* 2002; 36(1):48-54. <https://doi.org/10.1021/es000253sn> PMID:  
487 11817370
- 488 3. Bio-met. Bio-met Bioavailability Tool; UserGuide (Version5.0). 2019. [https://bio-](https://bio-met.net/wp-content/uploads/2019/08/bio-met_Guidance-Document_v5.0_-2019-27-06.pdf)  
489 [met.net/wp-content/uploads/2019/08/bio-met\\_Guidance-Document\\_v5.0\\_-2019-27-06.pdf](https://bio-met.net/wp-content/uploads/2019/08/bio-met_Guidance-Document_v5.0_-2019-27-06.pdf)
- 490 4. WFD UKTAG., Development and use of the copper bioavailability assessment tool (Draft).  
491 SC080021/8a-a; Water Framework Directive United Kingdom Technical Advisory Group:  
492 Scotland. 2012.

- 493 5. Verschoor AJ, Vink JP, Vijver MG. Simplification of biotic ligand models of Cu, Ni, and Zn  
494 by 1-, 2-, and 3-parameter transfer functions. *Integr Environ Assess. and Manage.* 2012; 8  
495 (4):738–48. <https://doi.org/10.1002/ieam.1298> PMID: 22556098
- 496 6. US EPA. Draft technical support document: recommended estimates for missing water  
497 quality parameters for application in EPA’s biotic ligand model, EPA 820-R-15-106; United  
498 States Environmental Protection Agency Office of Water 4304T: Washington DC. 2016.
- 499 7. McConaghie JB. Technical Support Document: An Evaluation to Derive Statewide Copper  
500 Criteria Using the Biotic Ligand Model, States of Oregon Department of Environmental  
501 Quality: Portland. 2016. <https://doi.org/10.13140/RG.2.2.26803.32804>
- 502 8. Thomas AJ, Petridis M, Walters SD, Gheytassi SM, Morgan RE. Two hidden layers are  
503 usually better than one. In: *International conference on engineering applications of neural*  
504 *networks. Engineering Applications of Neural Networks.* 2017; 279-290.  
505 [https://doi.org/10.1007/978-3-319-65172-9\\_24](https://doi.org/10.1007/978-3-319-65172-9_24)
- 506 9. Peters A, Merrington G, De Schamphelaere KA, Delbeke K. Regulatory consideration of  
507 bioavailability for metals: Simplification of input parameters for the chronic copper biotic  
508 ligand model. *Integr Environ Assess and Manage.* 2011; 7(3):437-44.  
509 <https://doi.org/10.1002/ieam.159> PMID: 21082669
- 510 10. De Schamphelaere KA, Heijerick DG, Janssen CR. Refinement and field validation of a  
511 biotic ligand model predicting acute copper toxicity to *Daphnia magna*. *Comp Biochem*  
512 *Physiol Part C: Toxicol Pharmacol.* 2002; 134:243–58. [https://doi.org/10.1016/S1532-](https://doi.org/10.1016/S1532-0456(02)00087-X)  
513 [0456\(02\)00087-X](https://doi.org/10.1016/S1532-0456(02)00087-X) PMID: 12356531

- 514 11. ECHA. Voluntary Risk Assessment of Copper, Copper II Sulphate Pentahydrate,  
515 Copper(I)Oxide, Copper(II)Oxide, Dicopper Chloride Trihydroxide. European Union Risk  
516 Assessment Report, European Copper Institute. 2008.
- 517 12. De Schamphelaere KA, Janssen CR. Development and field validation of a biotic ligand  
518 model predicting chronic copper toxicity to *Daphnia magna*. Environ Toxicol Chem. 2004;  
519 23(6):1365–75. <https://doi.org/10.1897/02-626> PMID: 15376521
- 520 13. Nys C, Regenmortel TV, Janssen CR, Oorts K, Smolders E, De Schamphelaere KA. A  
521 framework for ecological risk assessment of metal mixtures in aquatic systems. Environ  
522 Toxicol Chem. 2018; 37(3):623-42. <https://doi.org/10.1002/etc.4039> PMID: 29135043
- 523 14. Kingma DP, Ba J. Adam: A method for stochastic optimization. CoRR. 2015; 1412.6980.  
524 <https://arxiv.org/pdf/1412.6980.pdf>
- 525 15. Nair V, Hinton GE, Rectified linear units improve restricted boltzmann machines.  
526 International Conference on Machine Learning: Proceedings of the 27th International  
527 Conference on International Conference on Machine Learning. Omnipress. 2010; 807-814.  
528 <http://dblp.uni-trier.de/db/conf/icml/icml2010.html#NairH10>
- 529 16. Schmidt-Hieber J. Nonparametric regression using deep neural networks with ReLU  
530 activation function. Ann Statist. 2020; 48 (4):1875-97. <https://doi.org/10.1214/19-AOS1875>
- 531 17. van Vlaardingen PL, Traas TP, Wintersen AM, Aldenberg T. ETX 2.0 A Program to  
532 Calculate Hazardous Concentrations and Fraction Affected, Based on Normally Distributed  
533 Toxicity Data, RIVM report 601501028; National Institute for Public Health and the  
534 Environment (RIVM): Bilthoven. 2004.
- 535 18. Natural Environment Research Council. Windermere Humic Aqueous Model; Use's Guide  
536 (Version 7). Oxfordshire, UK. 2012.



- 537 19. US EPA. Aquatic Life Ambient Freshwater Quality Criteria-Copper, EPA-822-R-07-001;  
538 United States Environmental Protection Agency Office of Water 4304T: Washington DC.  
539 2007.
- 540 20. Swedish Environmental Research Institute. Testing the biotic ligand model for Swedish  
541 surface water conditions - a pilot study to investigate the applicability of BLM in Sweden,  
542 IVL Report B1858; IVL Swedish Environmental Research Institute Ltd.: Stockholm. 2009.
- 543 21. Kim JK, Shin M, Jan C, Jung S, Kim B. Comparison of TOC and DOC distribution and the  
544 oxidation efficiency of BOD and COD in several reservoirs and rivers in the Han River  
545 system. J Korean Soc Water Environ. 2007; 23(1):72-80.
- 546 22. Sobczak P, Rosińska A. Concentration of total organic carbon and Its fractions in surface  
547 water in Poland and Germany. Proceedings. 2020; 51(1):35.  
548 <https://doi.org/10.3390/proceedings2020051035>

549

550

551

552

553

554

555

556

557

558

559

560

561

562

563

564

565

566

567

568 **List of figures:**

569 **Fig 1.** Domain range of input variables in the training dataset used for the development of DNN  
570 (deep neural network-based) models as PNEC estimation tools. The dashed lines indicate a factor  
571 of five from the linear relationships between variables in Korean freshwaters. The first generated  
572 data (cross) are shown in Panel A. The selected data (cross) from the generated data and with the  
573 data removed (triangles) outside the domain range are shown in Panel B. The generated electrical  
574 conductivity data (cross) added to the selected data are shown in Panel C.

575 **Fig 2.** The training and validation results for the DNN(a) model with all BLM variables (A),  
576 DNN(b) with all BLM variables except alkalinity (B), and DNN(c) with the three variables of  
577 pH, DOC, and electrical conductivity (C). The average loss per epoch for the training and  
578 validation steps is shown in the right panels. The validation for the three different types of DNN  
579 models within the training dataset is shown in the left panels. The blue solid line indicates loss  
580 per epoch for training steps, and the red dashed line indicates loss per epoch for validation steps.  
581 The black solid line indicates a perfect match between the simulated and predicted BLM-based

582 PNECs. The black dotted line indicates an error of a factor of two between simulated and  
583 predicted BLM-based PNECs. Adj.  $r^2$  = adjusted  $r^2$  value.

584 **Fig 3.** Radar chart showing the ratios of pH and log10 values (different BLM input variables) of  
585 four different test datasets to those of the training dataset. The BLM input variables in the  
586 training dataset are marked by light shading. The BLM variable ratios in the test datasets are  
587 marked as the 95<sup>th</sup> percentile within the test datasets by dark shading. Train = training dataset;  
588 KR = Korean freshwater; BEL = Belgian freshwater; US = United States freshwater; SWE =  
589 Swedish freshwater.

590 **Fig 4.** Comparison of the test results of the surrogate models for copper BLM-based PNECs in  
591 Korean freshwater. The BLM-based PNECs were derived from 764 individual samples collected  
592 in 2014, 2015, and 2016. Panels A, B, and C show PNECs (plus) estimated by the deep neural  
593 network-based models DNN(a), DNN(b), and DNN(c), respectively. Panels D, E, and F show  
594 PNECs (open circle) estimated by Bio-met, mBAT, and PNEC-pro, respectively. Adj.  $r^2$  =  
595 adjusted  $r^2$  value.

596 **Fig 5.** Comparison of the test results of the surrogate models for copper BLM-based PNECs in  
597 Swedish freshwater. The BLM-based PNECs were derived from 4,639 individual samples (999  
598 river samples, 1,914 Malar Lake samples, and 1,726 tributary samples) collected in the Swedish  
599 river monitoring program of the Swedish University of Agricultural Sciences from 1997 to 2020.  
600 Panels A, B, and C show PNECs (plus) estimated by deep neural network-based DNN(a),  
601 DNN(b), and DNN(c), respectively. Panels D, E, and F show PNECs (open circle) estimated by  
602 Bio-met, mBAT, and PNEC-pro, respectively. Adj.  $r^2$  = adjusted  $r^2$  value.

603 **Fig 6.** Comparison of the test results of the surrogate models for copper BLM-based PNECs in  
604 United States freshwater. The BLM-based PNECs were derived from 363 samples collected by

605 the Oregon Department of Environmental Quality Water Monitoring Data Portal and the  
606 National Waters Information System. Panels A, B, and C show PNECs (plus) estimated by the  
607 deep neural network-based models DNN(a), DNN(b), and DNN(c), respectively. Panels D, E,  
608 and F show PNECs (open circle) estimated by Bio-met, mBAT, and PNEC-pro, respectively.  
609 Adj.  $r^2$  = adjusted  $r^2$  value.

610 **Fig 7.** Comparison of the test results of the surrogate models for copper BLM-based PNECs in  
611 Belgian freshwater. The BLM-based PNECs were derived from 3,187 individual samples  
612 collected by Nys et al. (2018). Panels A, B, and C show PNECs (plus) estimated by the deep  
613 neural network-based models DNN(a), DNN(b), and DNN(c), respectively. Panels D, E, and F  
614 show PNECs (open circle) estimated by Bio-met, mBAT, and PNEC-pro, respectively. Adj.  $r^2$  =  
615 adjusted  $r^2$  value.

616

617

618

619

620

621

622

623

624

625

626

627

628

629

630

631

632

633

634

635

636

637

638 Fig 1

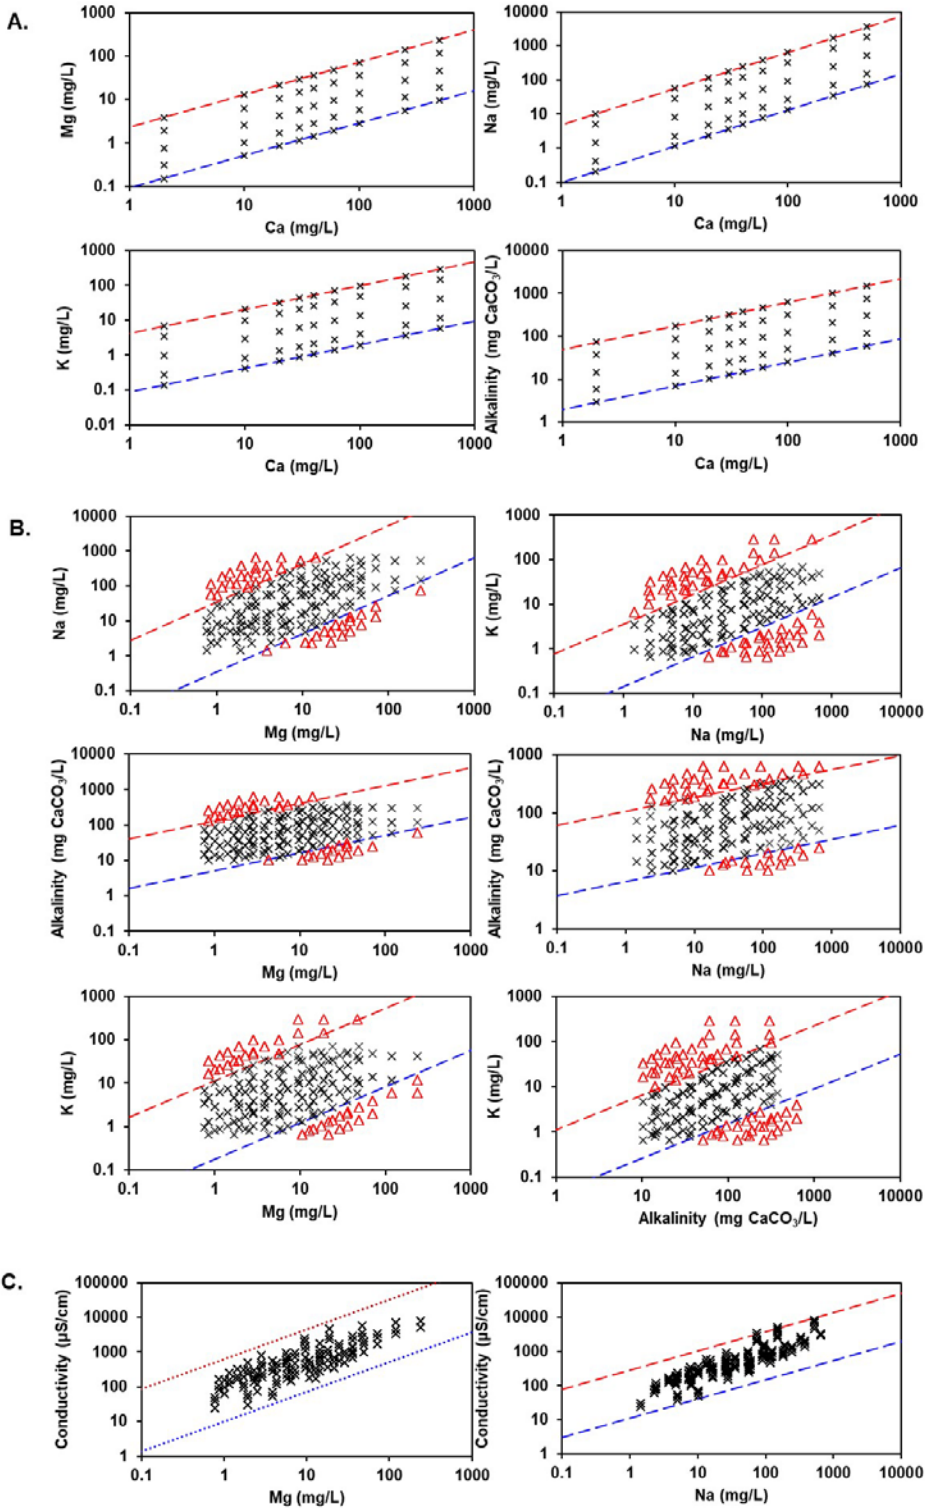

639

640

641 Fig 2

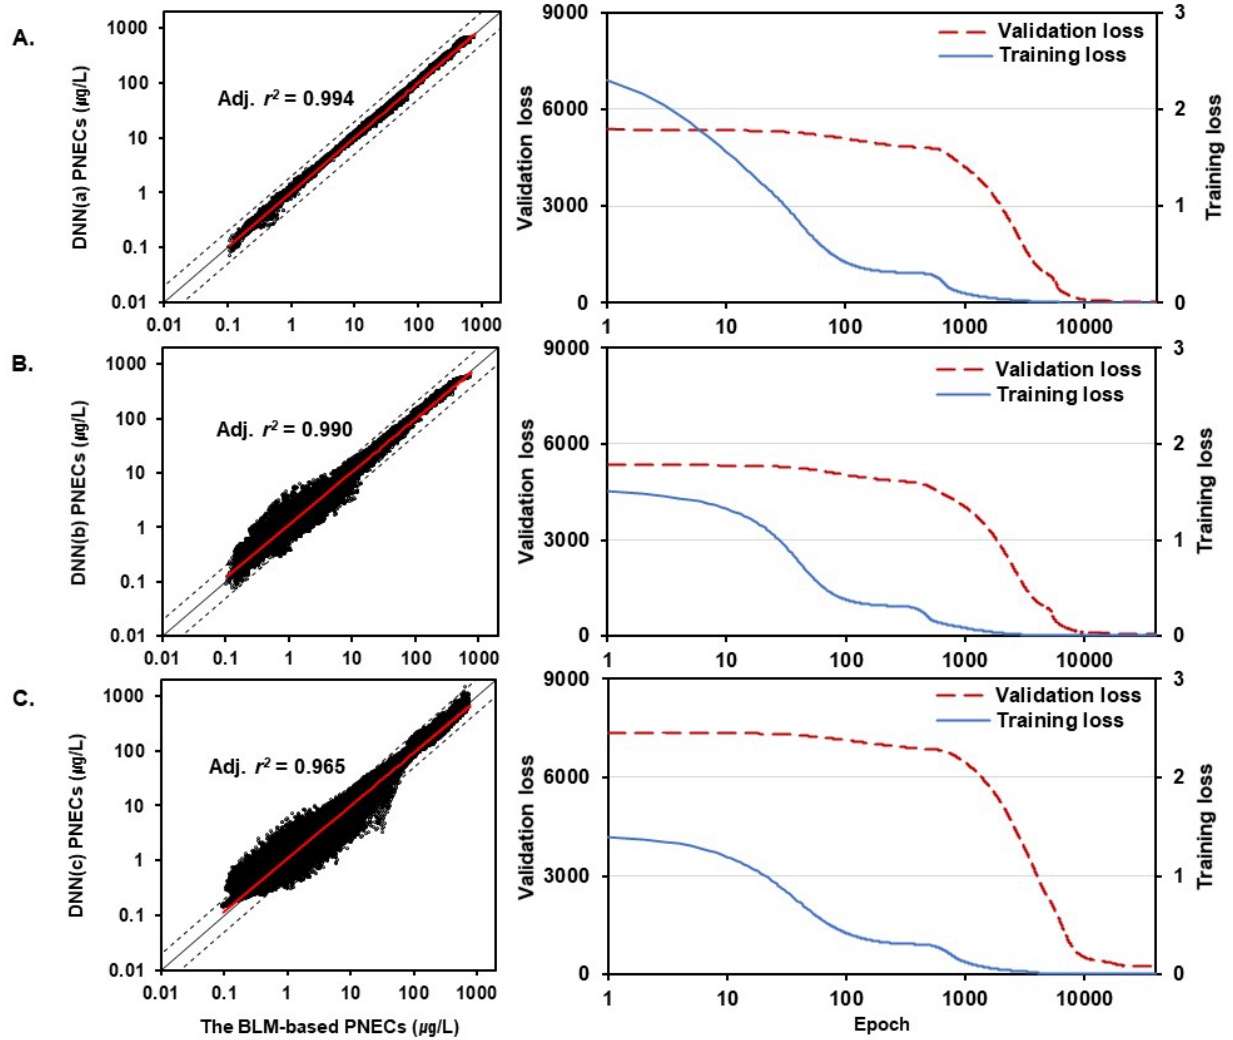

642

643

644

645

646

647

648

649

650 Fig 3

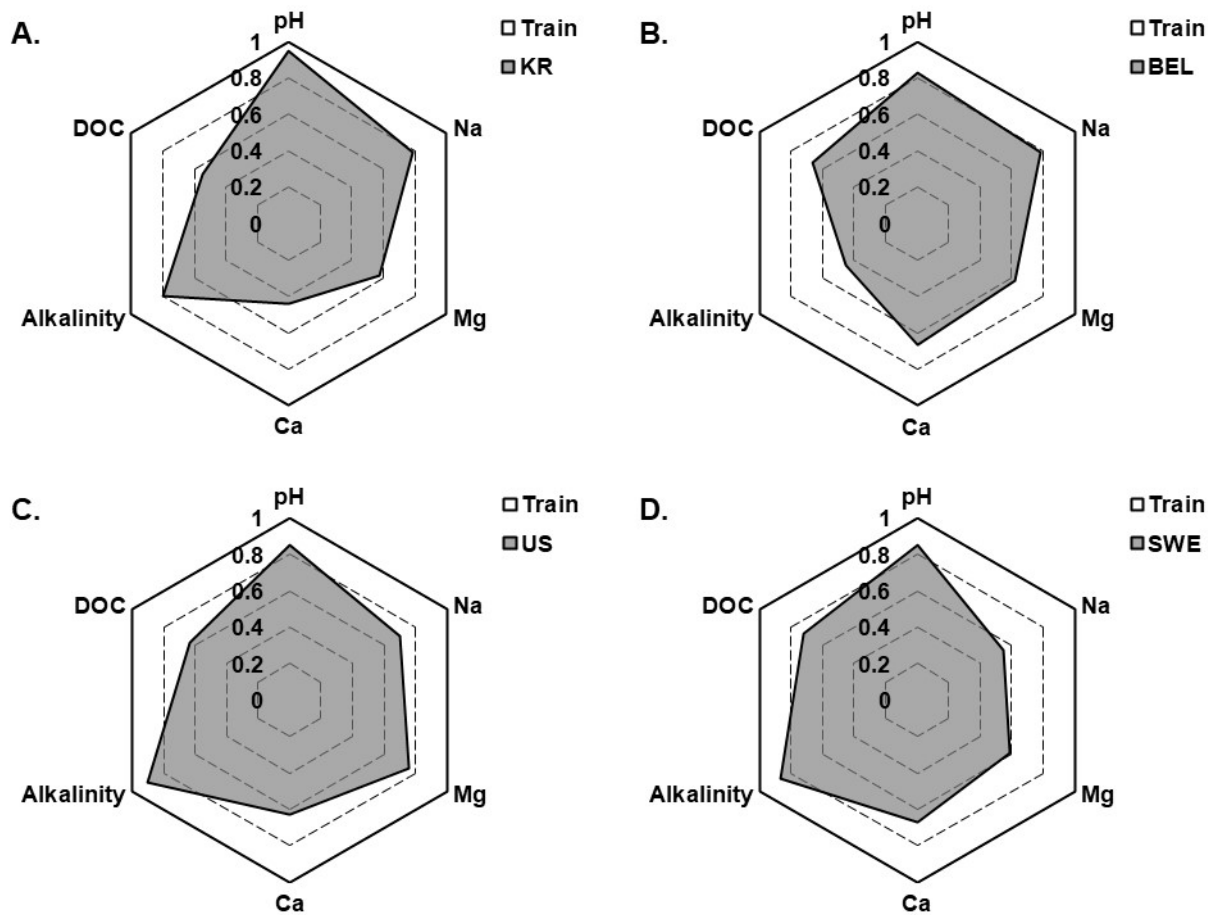

651

652

653

654

655

656

657

658

659

660

661 Fig 4



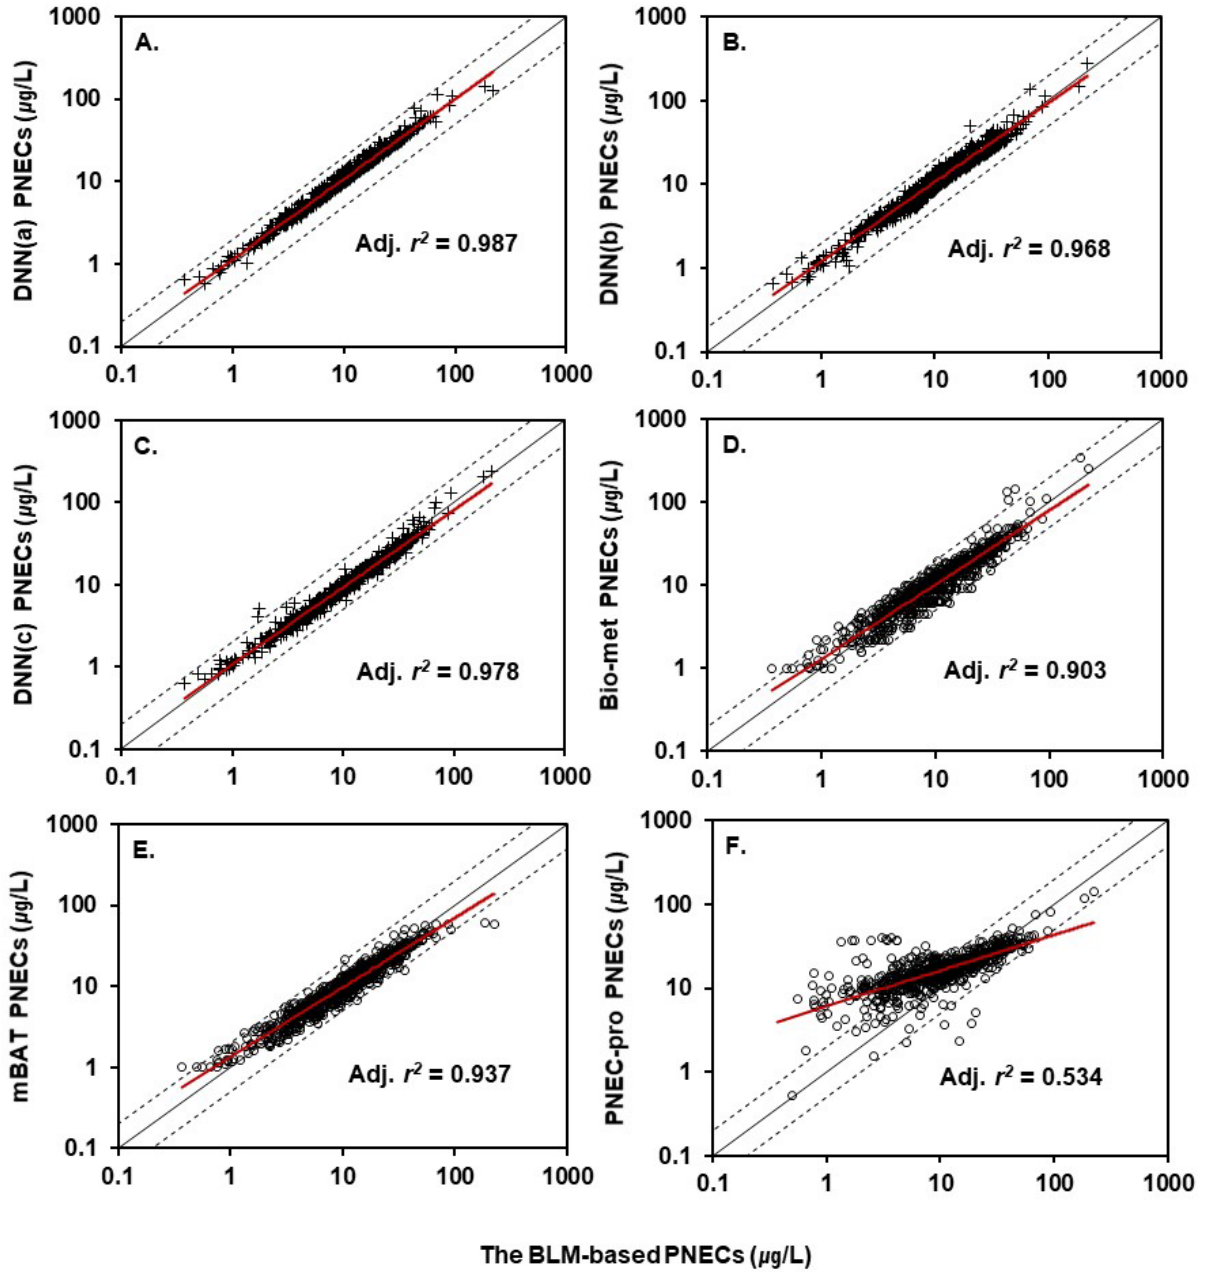

662

663

664

665

666

667 Fig 5

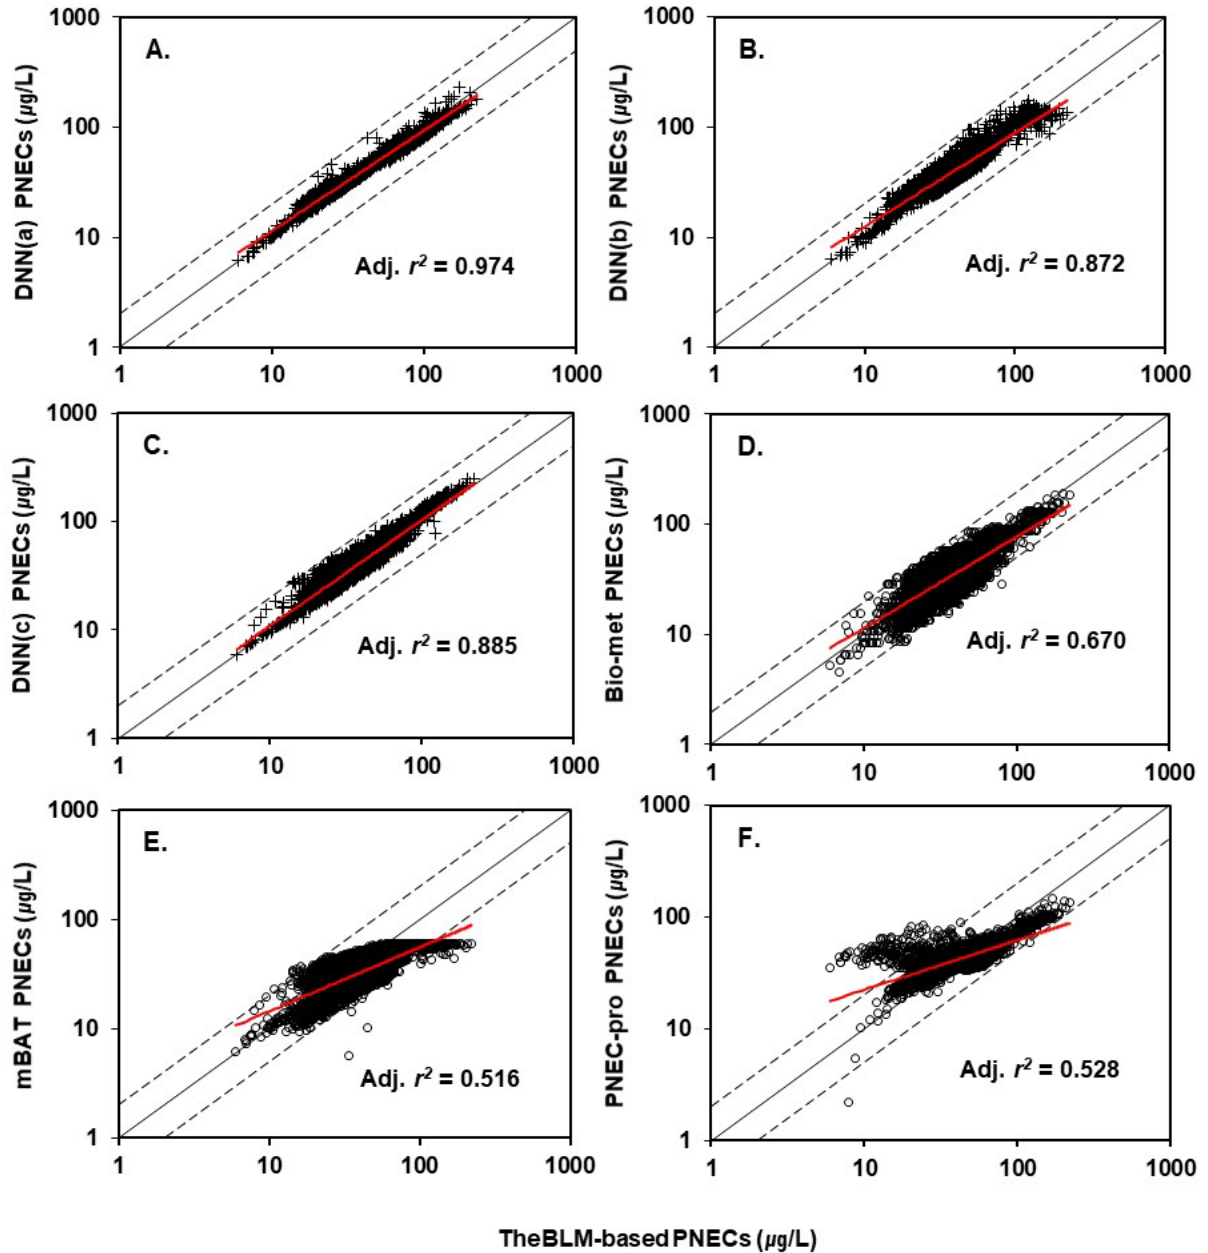

668

669

670

671

672

673 Fig 6

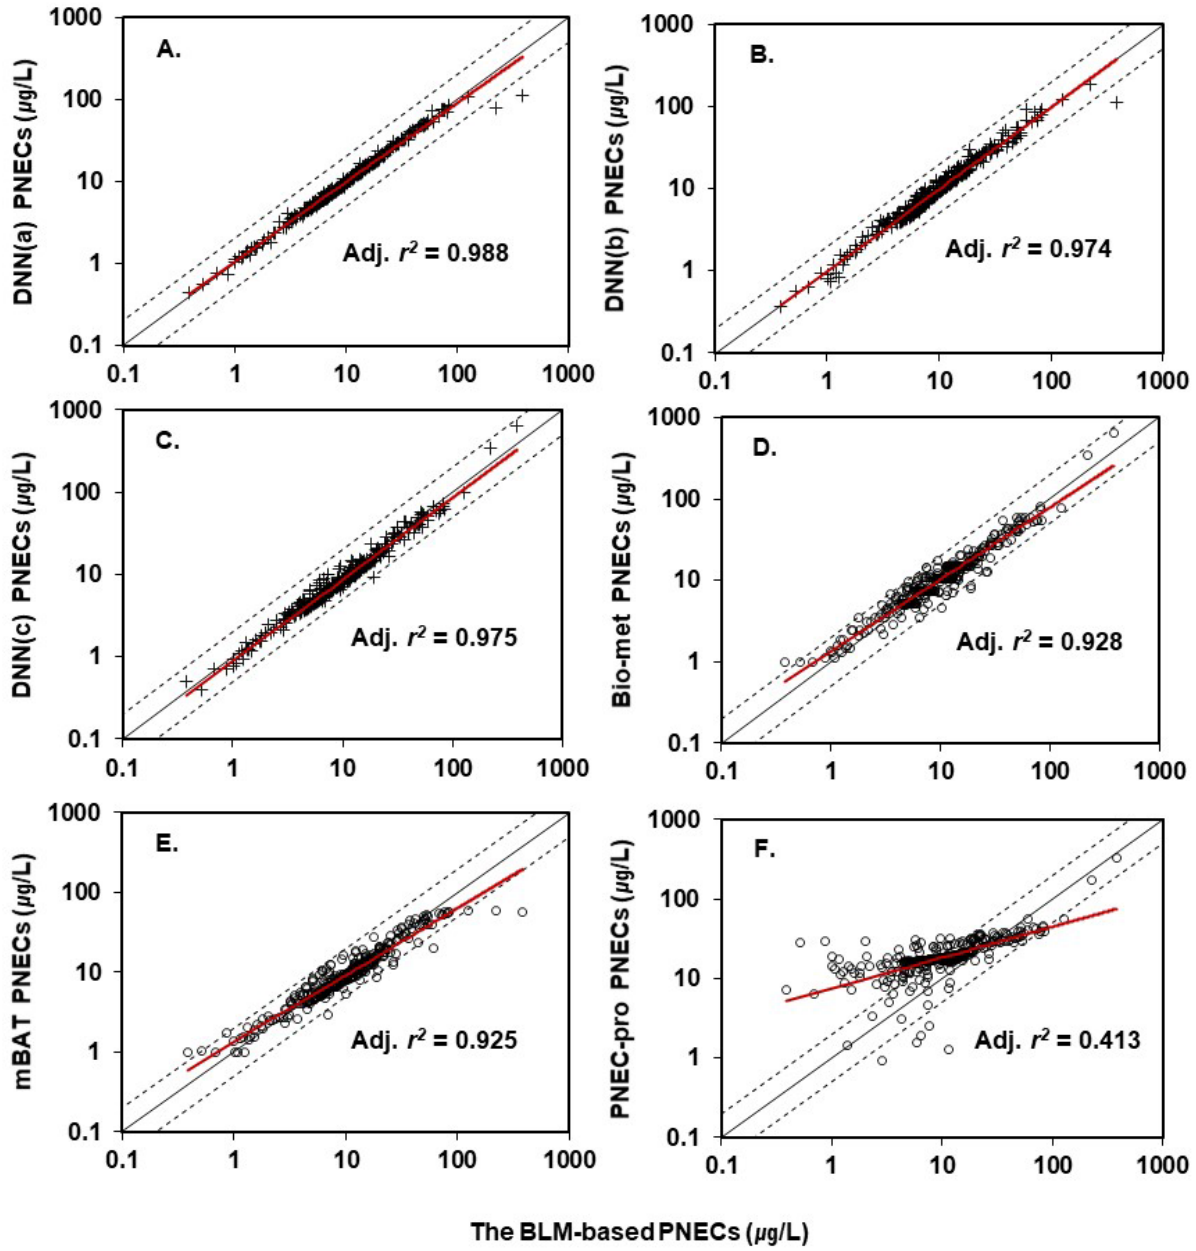

674

675

676

677

678

679 Fig 7

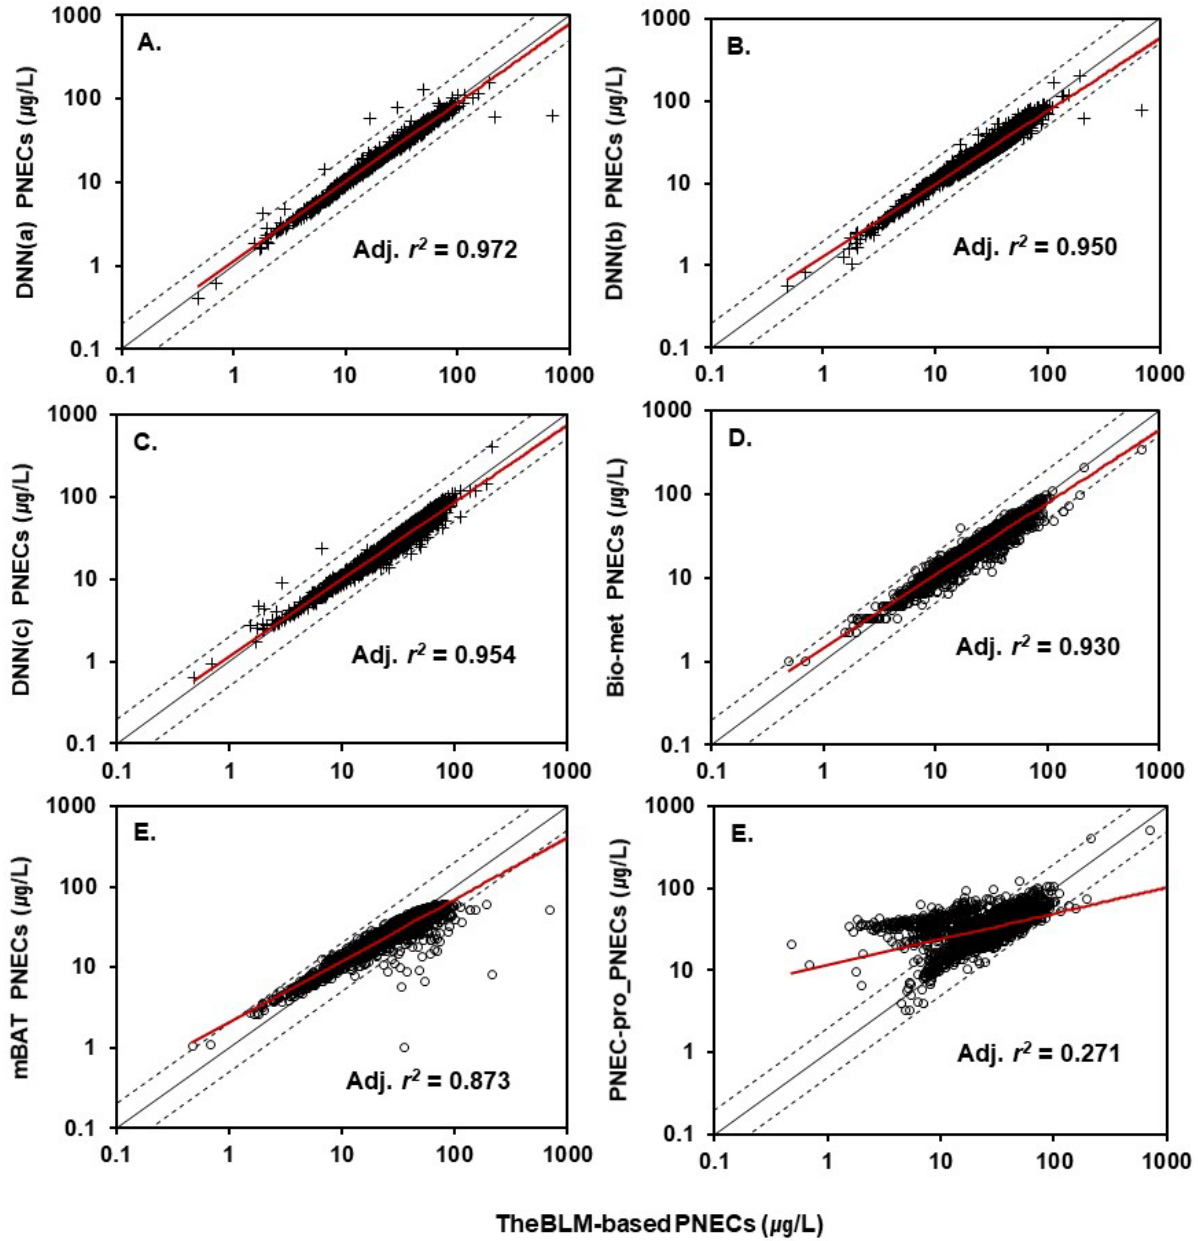

680

681

682

683

684

685 **Table 1.** Ranges for deep learning hyperparameter optimization and hyperparameter  
686 configuration.

| Hyperparameter                        | Value                    | Search range                                                                                              |
|---------------------------------------|--------------------------|-----------------------------------------------------------------------------------------------------------|
| Learning rate                         | 0.005                    | 0.1, 0.01, 0.005, 0.001, 0.0005                                                                           |
| Optimization method                   | AdaMax                   | AdaM, AdaMax, SGD                                                                                         |
| Number of hidden layers               | 3                        | 1, 2, 3, 5                                                                                                |
| Number of hidden units                | {20, 15, 10}             | {20, 15, 10}, {64, 128, 32}                                                                               |
| Activation functions of hidden layers | {sigmoid, sigmoid, ReLU} | {Sigmoid, Sigmoid, Sigmoid},<br>{Sigmoid, Sigmoid, ReLU},<br>{ReLU, ReLU, Sigmoid},<br>{ReLU, ReLU, ReLU} |
| Batch size                            | Maximum                  | Maximum                                                                                                   |
| Number of epochs                      | 20,000                   | 500–40,000                                                                                                |

687 SGD = stochastic gradient descent; ReLU = rectified linear unit

688

689

690

691

692

693

694

695

696

697

698

699

700

701 **Table 2.** Comparison of newly developed deep neural network models with the existing  
702 predicted no-effect concentration estimation tools

| Model    | Method                           | Training dataset                      | Input variable                  | Test dataset | Adj. $r^2$ | AIC   | RSE   |
|----------|----------------------------------|---------------------------------------|---------------------------------|--------------|------------|-------|-------|
| DNN(a)   | Deep neural network              | Simulation data (n = 107,712)         | pH, Ca, Mg, Na, DOC, Alkalinity | Korea        | 0.987      | -1419 | 0.056 |
|          |                                  |                                       |                                 | US           | 0.988      | -690  | 0.044 |
|          |                                  |                                       |                                 | Sweden       | 0.974      | -7315 | 0.035 |
|          |                                  |                                       |                                 | Belgium      | 0.972      | -4924 | 0.053 |
| DNN(b)   |                                  |                                       | pH, Ca, Mg, Na, DOC             | Korea        | 0.968      | -1125 | 0.078 |
|          |                                  |                                       |                                 | US           | 0.974      | -565  | 0.065 |
|          |                                  |                                       |                                 | Sweden       | 0.872      | -4133 | 0.070 |
|          |                                  |                                       |                                 | Belgium      | 0.950      | -4138 | 0.086 |
| DNN(c)   |                                  |                                       | pH, DOC, EC                     | Korea        | 0.978      | -1255 | 0.069 |
|          |                                  |                                       |                                 | US           | 0.975      | -573  | 0.090 |
|          |                                  |                                       |                                 | Sweden       | 0.885      | -4348 | 0.073 |
|          |                                  |                                       |                                 | Belgium      | 0.954      | -4257 | 0.068 |
| Bio-met  | Look-up table                    | Simulation data (n = 23,054)          | pH, DOC, Ca                     | Korea        | 0.903      | -766  | 0.125 |
|          |                                  |                                       |                                 | US           | 0.928      | -408  | 0.109 |
|          |                                  |                                       |                                 | Sweden       | 0.670      | -2228 | 0.125 |
|          |                                  |                                       |                                 | Belgium      | 0.930      | -3674 | 0.082 |
| mBAT     | Multivariate polynomial function | Simulation data (n = 8,400)           | pH, DOC, Ca                     | Korea        | 0.937      | -909  | 0.107 |
|          |                                  |                                       |                                 | US           | 0.925      | -402  | 0.119 |
|          |                                  |                                       |                                 | Sweden       | 0.516      | -1456 | 0.159 |
|          |                                  |                                       |                                 | Belgium      | 0.873      | -2848 | 0.110 |
| PNEC-pro | Multiple linear regression       | Measured data in Netherland (n = 241) | DOC (pH, Ca, Mg, Na)            | Korea        | 0.534      | -243  | 0.346 |
|          |                                  |                                       |                                 | US           | 0.413      | -74   | 0.407 |
|          |                                  |                                       |                                 | Sweden       | 0.528      | -1504 | 0.138 |
|          |                                  |                                       |                                 | Belgium      | 0.271      | -428  | 0.261 |

703 EC = electrical conductivity; Adj.  $r^2$  = adjusted  $r^2$  value; AIC = Akaike information criterion;  
 704 RSE = residual standard error.

705
